# Supplementary material for: Alkali-metal organomagnesiate complexes as catalysts for highly chemoselective crossed-Tishchenko reactions
Source: Royal Society of Chemistry journal article supplement (doi:10.1039/d0dt01114b), 2020-01-01

## Supporting Information

# Alkali-metal Organomagnesiate Complexes as Catalysts for Highly Chemselective Crossed-Tishchenko Reaction

Zhiqiang Guo,<sup>\*a</sup> Tengfei Pang,<sup>b</sup> Yakong Wang,<sup>b</sup> Yongbin Zhang,<sup>c</sup> Xuehong  
Wei<sup>\*a,c</sup>

<sup>a</sup>*Scientific Instrument Center, Shanxi University, Taiyuan, 030006, P.R. China*

<sup>b</sup>*School of Chemistry and Chemical Engineering, Shanxi University, Taiyuan, 030006,  
P.R. China*

<sup>c</sup>*Institute of Applied Chemistry, Shanxi University, Taiyuan 030006, P. R. China.*

\*Corresponding author: Email: [gzq@sxu.edu.cn](mailto:gzq@sxu.edu.cn), [xhwei@sxu.edu.cn](mailto:xhwei@sxu.edu.cn)

## Contents

|                                                                                                |     |
|------------------------------------------------------------------------------------------------|-----|
| Experimental Procedures.....                                                                   | S2  |
| The Procedure for Crossed-Tishchenko Reaction Catalyzed by Complex (1-5).....                  | S2  |
| <b>The Control Reactions</b> .....                                                             | S6  |
| Crystal Data and Structure Refinement Details of (1), (3) and (4).....                         | S7  |
| ORTEP Diagram of Compound 2a and 2e.....                                                       | S8  |
| Crystal Data and Structure Refinement Details of 2a and 2e.....                                | S9  |
| <sup>1</sup> H and <sup>13</sup> C NMR Spectra of Alkali-metal Organomagnesiate Complexes..... | S10 |
| Characterization Data of the Ester Compounds.....                                              | S15 |
| References .....                                                                               | S18 |
| <sup>1</sup> H and <sup>13</sup> C NMR Spectra of the ester compounds.....                     | S19 |

## Experimental Procedures

### 1. The Procedure for Crossed-Tishchenko Reaction Catalyzed by Complex 1-5

(a) In a glovebox, to a 50 mL sealed tube with a magnetic stirring bar, was successively added benzaldehyde (102  $\mu\text{L}$ , 1.0 mmol), *o*-bromobenzaldehyde (117  $\mu\text{L}$ , 1.0 mmol) catalyst **1** (0.0312 g, 0.05 mmol). The mixture was stirred at 30  $^{\circ}\text{C}$  for 3 h. The reaction was then quenched with  $\text{H}_2\text{O}$  (10 mL) and extracted with ethyl acetate (3 x 10 mL). The combined organic layers were dried over  $\text{Na}_2\text{SO}_4$  and concentrated. The yields were determined by  $^1\text{H}$  NMR spectroscopy with trichloroethylene (90  $\mu\text{L}$ , 1 mmol) as an internal standard. The NMR yield of 2-bromobenzyl benzoate is 37%.

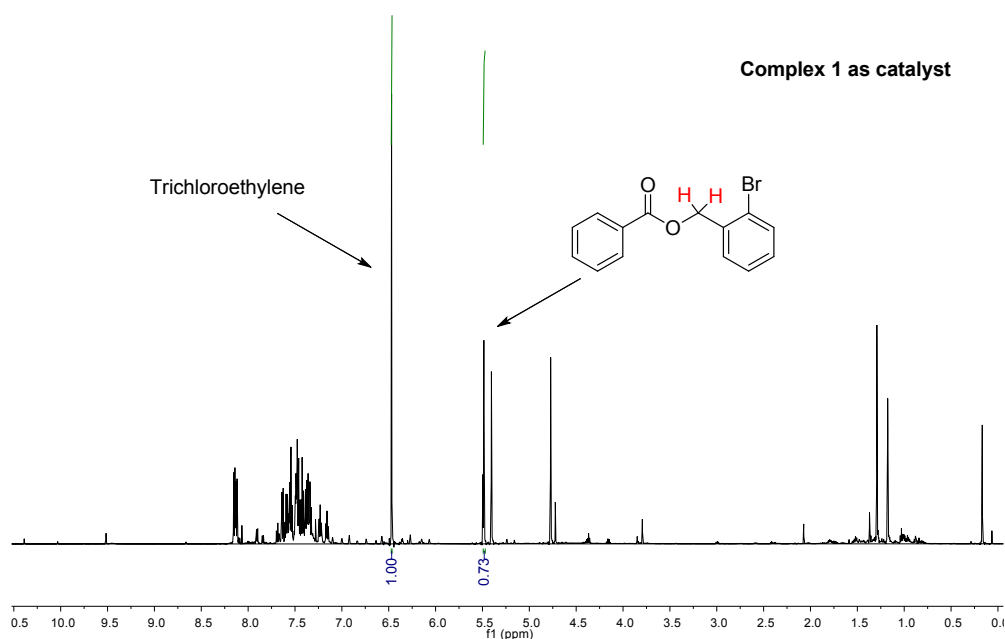

(b) In a glovebox, to a 50 mL sealed tube with a magnetic stirring bar, was successively added benzaldehyde (102  $\mu\text{L}$ , 1.0 mmol), *o*-bromobenzaldehyde (117  $\mu\text{L}$ , 1.0 mmol) catalyst **2** (0.0282 g, 0.05 mmol). The mixture was stirred at 30  $^{\circ}\text{C}$  for 3 h. The reaction was then quenched with  $\text{H}_2\text{O}$  (10 mL) and extracted with ethyl acetate (3 x 10 mL). The combined organic layers were dried over  $\text{Na}_2\text{SO}_4$  and concentrated. The yields were determined by  $^1\text{H}$  NMR spectroscopy with trichloroethylene (90  $\mu\text{L}$ , 1 mmol) as an internal standard. The NMR yield of 2-bromobenzyl benzoate is 41%.

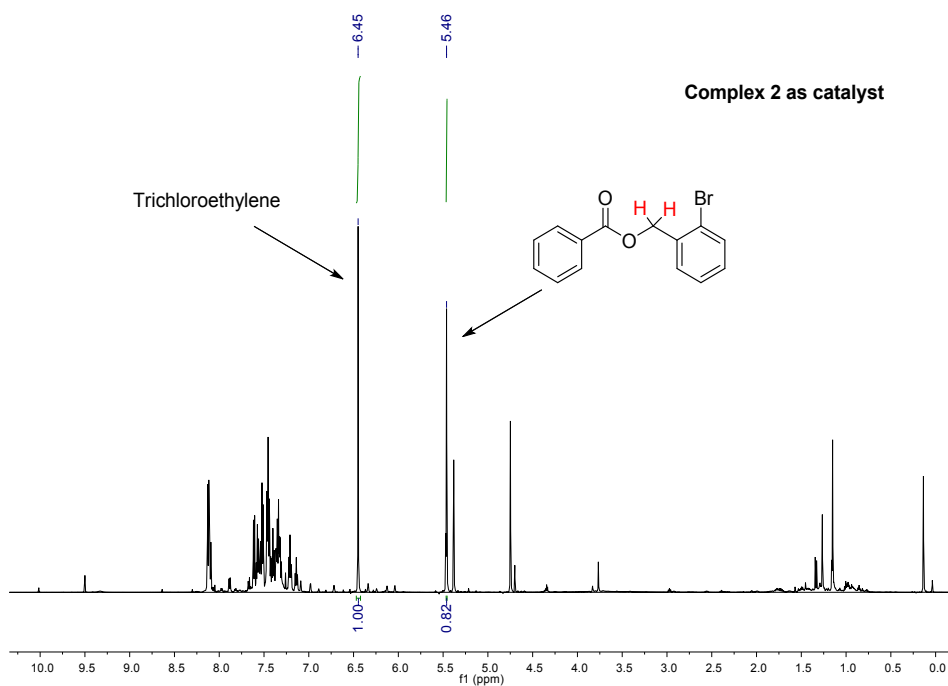

(c) In a glovebox, to a 50 mL sealed tube with a magnetic stirring bar, was successively added benzaldehyde (102  $\mu\text{L}$ , 1.0 mmol), *o*-bromobenzaldehyde (117  $\mu\text{L}$ , 1.0 mmol) catalyst **3** (0.0329 g, 0.05 mmol). The mixture was stirred at 30  $^{\circ}\text{C}$  for 3 h. The reaction was then quenched with  $\text{H}_2\text{O}$  (10 mL) and extracted with ethyl acetate (3 x 10 mL). The combined organic layers were dried over  $\text{Na}_2\text{SO}_4$  and concentrated. The yields were determined by  $^1\text{H}$  NMR spectroscopy with trichloroethylene (90  $\mu\text{L}$ , 1 mmol) as an internal standard. The NMR yield of 2-bromobenzyl benzoate is 57%.

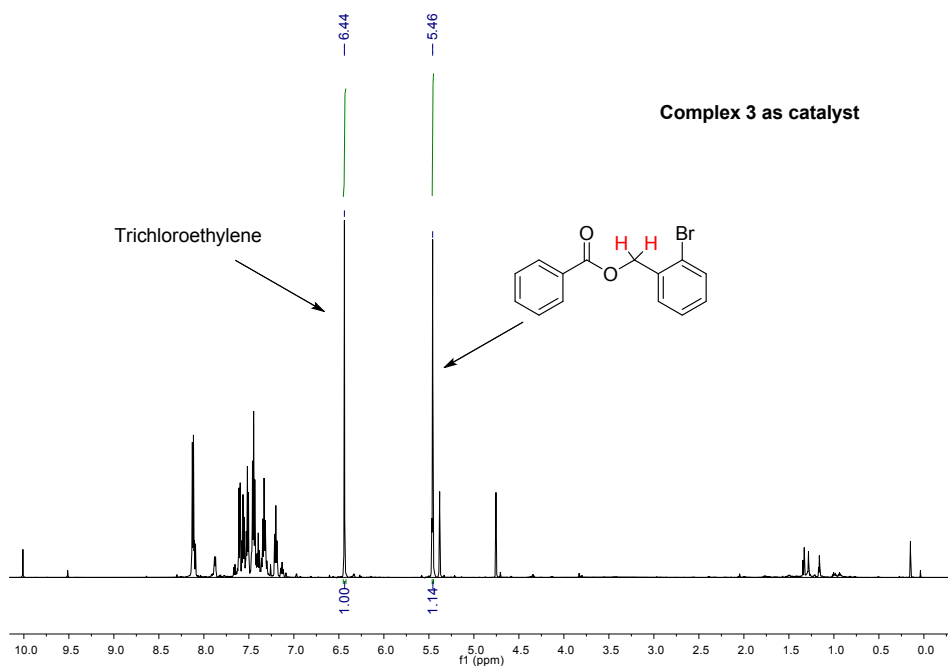

(d) In a glovebox, to a 50 mL sealed tube with a magnetic stirring bar, was successively added benzaldehyde (102  $\mu\text{L}$ , 1.0 mmol), *o*-bromobenzaldehyde (117  $\mu\text{L}$ , 1.0 mmol) catalyst **4** (0.0371 g, 0.05 mmol). The mixture was stirred at 30  $^{\circ}\text{C}$  for 3 h. The reaction was then quenched with  $\text{H}_2\text{O}$  (10 mL) and extracted with ethyl acetate (3 x 10 mL). The combined organic layers were dried over  $\text{Na}_2\text{SO}_4$  and concentrated. The yields were determined by  $^1\text{H}$  NMR spectroscopy with trichloroethylene (90  $\mu\text{L}$ , 1 mmol) as an internal standard. The NMR yield of 2-bromobenzyl benzoate is 54%.

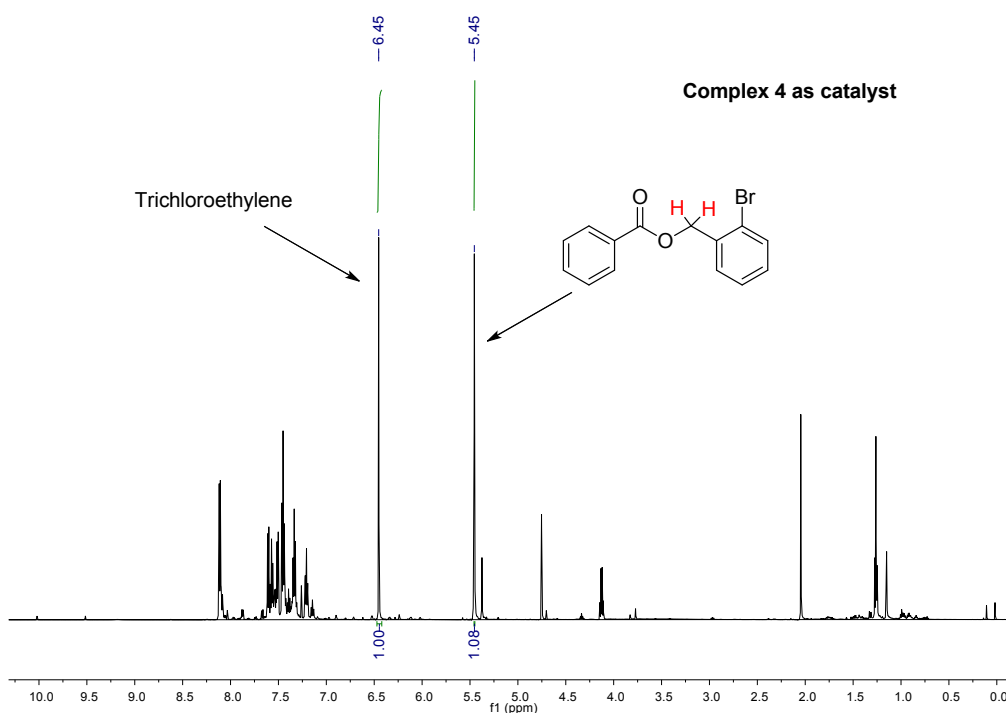

(e) In a glovebox, to a 50 mL sealed tube with a magnetic stirring bar, was successively added benzaldehyde (102  $\mu\text{L}$ , 1.0 mmol), *o*-bromobenzaldehyde (117  $\mu\text{L}$ , 1.0 mmol) catalyst **5** (0.0344 g, 0.05 mmol). The mixture was stirred at 30  $^{\circ}\text{C}$  for 3 h. The reaction was then quenched with  $\text{H}_2\text{O}$  (10 mL) and extracted with ethyl acetate (3 x 10 mL). The combined organic layers were dried over  $\text{Na}_2\text{SO}_4$  and concentrated. The yields were determined by  $^1\text{H}$  NMR spectroscopy with trichloroethylene (90  $\mu\text{L}$ , 1 mmol) as an internal standard. The NMR yield of 2-bromobenzyl benzoate is 50%.

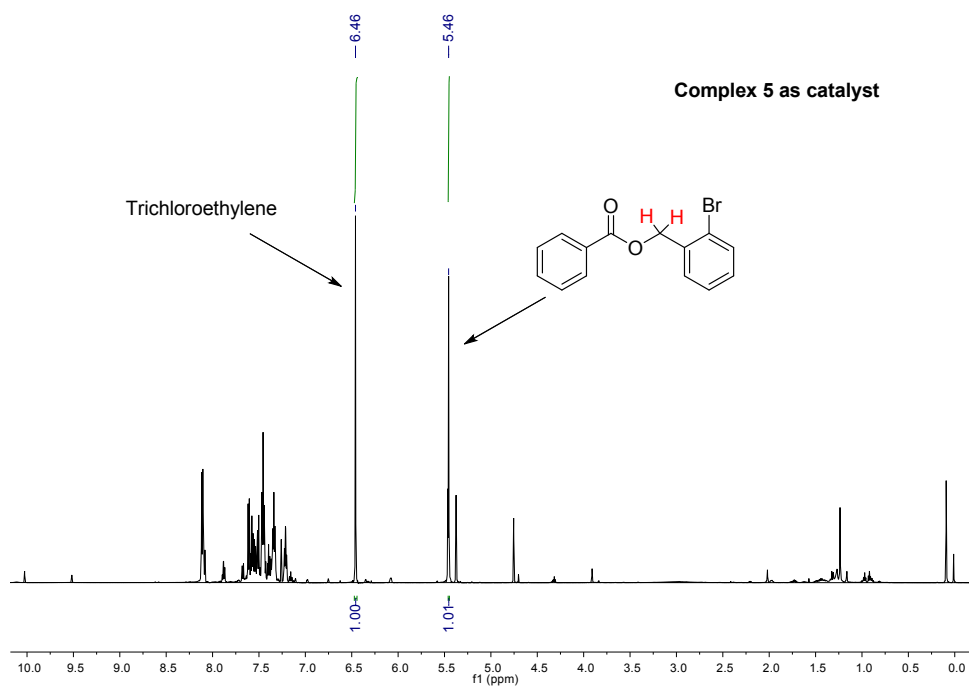

## 2. The Control Reactions.

In the same condition, the control reactions were carried out using 2-aminopyrrolyl lithium complex  $\{[2-(\text{CH}_2\text{NHCMe}_3)\text{C}_4\text{H}_3\text{N}]\text{Li}(\text{THF})\}_2$ , 2-aminopyrrolyl di-lithium compounds  $\{\mu\text{-}\eta^5\text{:}\eta^1\text{-}2\text{-(Me}_3\text{CNCH}_2\text{)C}_4\text{H}_3\text{N}]\text{Li}_2(\text{TMEDA})\}_2$  and sodium alkyl magnesiate  $\{\text{}^n\text{BuMg}[2\text{-(Me}_3\text{CNCH}_2\text{)C}_4\text{H}_3\text{N}]\text{Na}(\text{Et}_2\text{O})\}_\infty$  (**3**) with the same supporting ligand as catalysts. As shown in the following scheme, the NMR results show that mono-, di-lithioaminopyrrolyl complex can catalyze Tishchenko reaction, but their selectivity is lower than that of sodium alkyl magnesiate.

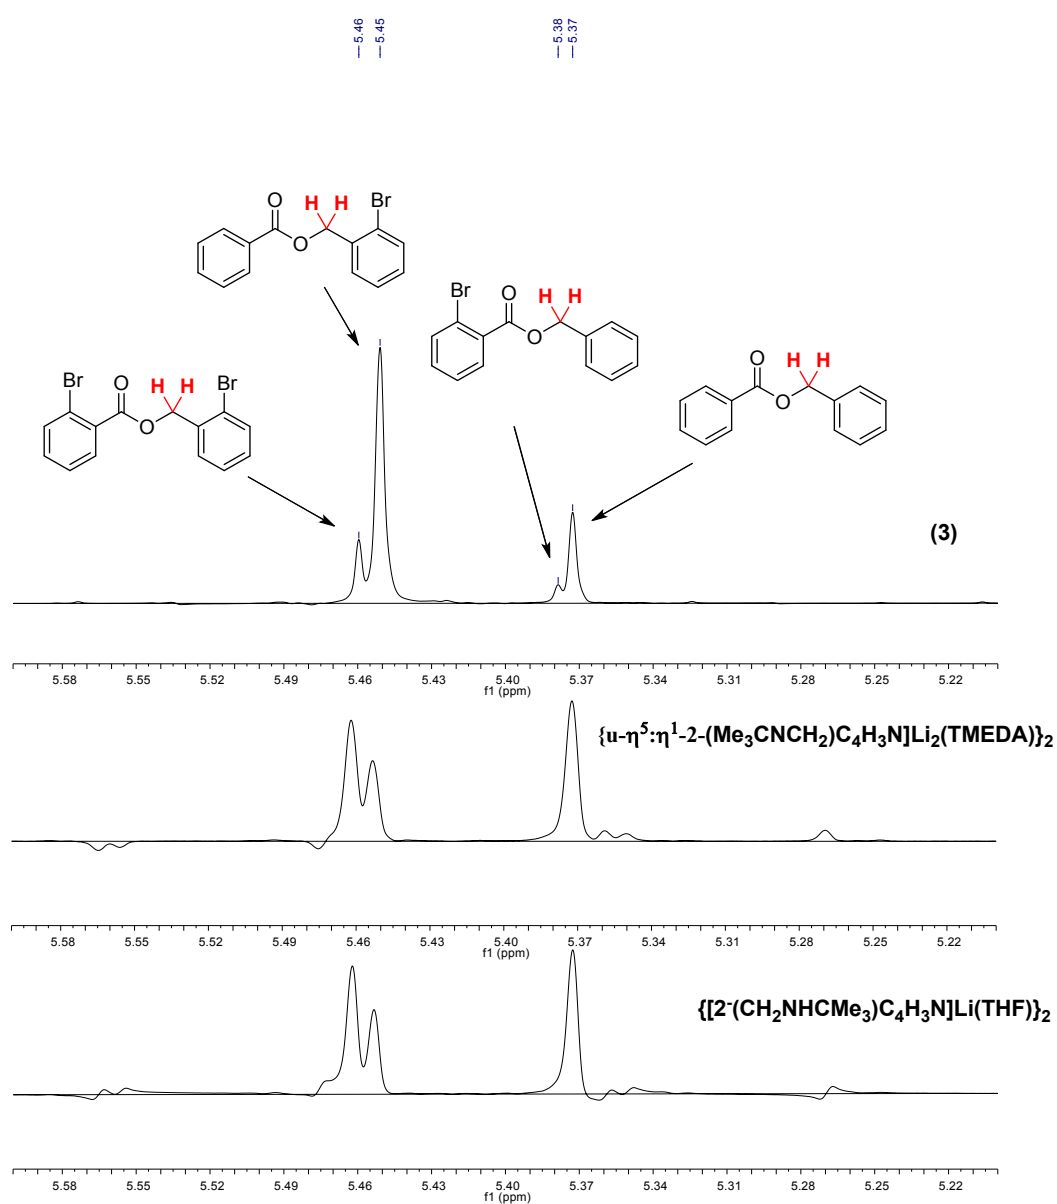

## Crystal data and Structure Refinement Details of 1, 3 and 4

Table S1. Single crystal X-ray data and structure refinement details for 1, 3, 4.

| Complex                                      | 1                                                                               | 3                                                                                             | 4                                                                              |
|----------------------------------------------|---------------------------------------------------------------------------------|-----------------------------------------------------------------------------------------------|--------------------------------------------------------------------------------|
| Empirical formula                            | C <sub>34</sub> H <sub>60</sub> Li <sub>2</sub> MgN <sub>4</sub> O <sub>4</sub> | C <sub>34</sub> H <sub>66</sub> Mg <sub>2</sub> N <sub>4</sub> Na <sub>2</sub> O <sub>2</sub> | C <sub>38</sub> H <sub>77</sub> Mg <sub>2</sub> N <sub>8</sub> Na <sub>2</sub> |
| Formula weight                               | 627.05                                                                          | 655.49                                                                                        | 740.68                                                                         |
| Temperature (K)                              | 200(2)                                                                          | 136(2)                                                                                        | 150(2)                                                                         |
| Wavelength (Å)                               | 0.71073                                                                         | 0.71073                                                                                       | 0.71073                                                                        |
| Crystal system                               | Monoclinic                                                                      | Orthorhombic                                                                                  | Monoclinic                                                                     |
| space group                                  | C2/c                                                                            | Pbca                                                                                          | P2(1)/c                                                                        |
| a (Å)                                        | 22.586(2)                                                                       | 17.2336(6)                                                                                    | 18.5707(7)                                                                     |
| b (Å)                                        | 11.7778(12)                                                                     | 19.0795(6)                                                                                    | 17.2230(6)                                                                     |
| c (Å)                                        | 17.703(3)                                                                       | 24.5532(8)                                                                                    | 15.7369(6)                                                                     |
| α (deg)                                      | 90.00                                                                           | 90.00                                                                                         | 90.00                                                                          |
| β (deg)                                      | 126.618(2)                                                                      | 90.00                                                                                         | 112.5610(10)                                                                   |
| γ (deg)                                      | 90.00                                                                           | 90.00                                                                                         | 90.00                                                                          |
| Volume (Å <sup>3</sup> )                     | 3779.8(8)                                                                       | 8073.3(5)                                                                                     | 4648.1(3)                                                                      |
| Z                                            | 4                                                                               | 8                                                                                             | 4                                                                              |
| D <sub>c</sub> (g/cm <sup>-3</sup> )         | 1.102                                                                           | 1.079                                                                                         | 1.058                                                                          |
| M (mm <sup>-1</sup> )                        | 0.085                                                                           | 0.113                                                                                         | 0.104                                                                          |
| F(000)                                       | 1368                                                                            | 2864                                                                                          | 1628                                                                           |
| Crystal size (mm)                            | 0.45 x 0.40 x 0.40                                                              | 0.30 x 0.30 x 0.20                                                                            | 0.30 x 0.30 x 0.20                                                             |
| Theta range for data collection              | 3.27 to 28.81 deg.                                                              | 2.89 to 28.28 deg.                                                                            | 2.85 to 27.34 deg.                                                             |
| Reflections collected / unique               | 27282 / 3320<br>[R(int) = 0.0801]                                               | 57967 / 7125<br>[R(int) = 0.0315]                                                             | 34123 / 8183 [R(int) = 0.0341]                                                 |
| Completeness to theta = 25.05                | 98.8 %                                                                          | 99.7 %                                                                                        | 99.5 %                                                                         |
| Max. and min. transmission                   | 0.967 and 0.963                                                                 | 0.9778 and 0.9670                                                                             | 0.9796 and 0.9696                                                              |
| Data / restraints / parameters               | 3320/ 1 / 207                                                                   | 7125/ 541 / 434                                                                               | 8183 / 43/ 476                                                                 |
| Goodness-of-fit                              | 0.989                                                                           | 1.062                                                                                         | 1.048                                                                          |
| R <sub>1</sub> / wR <sub>2</sub> [I > 2σ(I)] | 0.0795 / 0.1336                                                                 | 0.0703/ 0.2013                                                                                | 0.0761/ 0.2040                                                                 |
| R <sub>1</sub> / wR <sub>2</sub> (all data)  | 0.1635/ 0.1826                                                                  | 0.0808 / 0.2183                                                                               | 0.1000 / 0.2287                                                                |

## ORTEP Diagram of Compound 2a and 2e

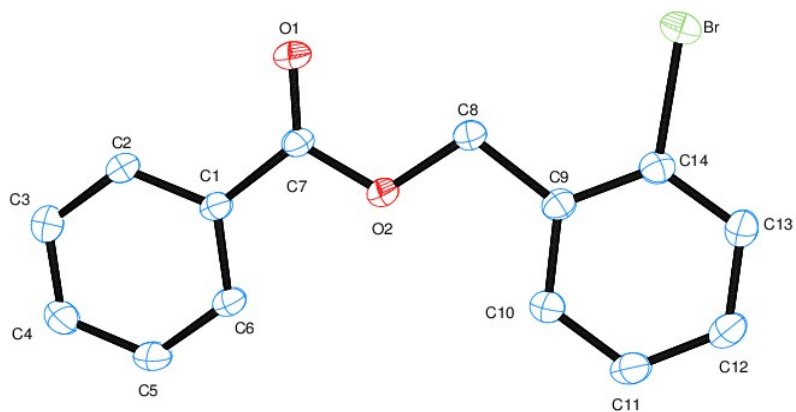

Figure S1. ORTEP diagram of compound **2a** with thermal ellipsoids at 30% probability (H not shown for clarity)

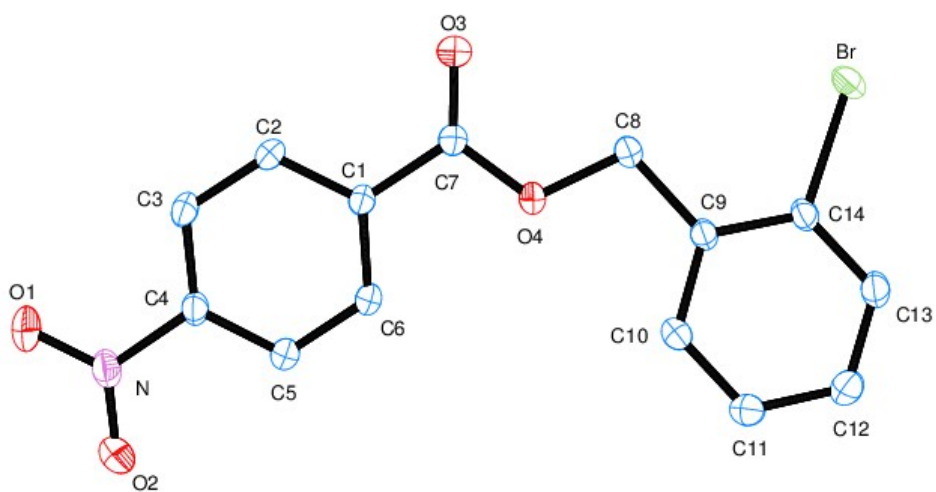

Figure S2. ORTEP diagram of compound **2e** with thermal ellipsoids at 30% probability (H not shown for clarity)



## Crystal Data and Structure Refinement Details of 2a and 2e

Table S2. Single crystal X-ray data and structure refinement details for 2a and 2e

| Complex                                      | 2a                                               | 2e                                                |
|----------------------------------------------|--------------------------------------------------|---------------------------------------------------|
| Empirical formula                            | C <sub>14</sub> H <sub>11</sub> BrO <sub>2</sub> | C <sub>14</sub> H <sub>10</sub> BrNO <sub>4</sub> |
| Formula weight                               | 291.14                                           | 336.14                                            |
| Temperature (K)                              | 296(2)                                           | 298(2)                                            |
| Wavelength (Å)                               | 0.71073                                          | 0.71073                                           |
| Crystal system                               | Triclinic                                        | Triclinic                                         |
| space group                                  | P-1                                              | P-1                                               |
| a (Å)                                        | 8.2096(12)                                       | 7.1524(7)                                         |
| b (Å)                                        | 8.2608(12)                                       | 9.2277(10)                                        |
| c (Å)                                        | 9.3910(13)                                       | 10.9410(11)                                       |
| α (deg)                                      | 76.231(6)                                        | 76.639(4)                                         |
| β (deg)                                      | 81.102(5)                                        | 70.963(4)                                         |
| γ (deg)                                      | 84.399(5)                                        | 77.997(3)                                         |
| Volume (Å <sup>3</sup> )                     | 609.90(15)                                       | 657.20(12)                                        |
| Z                                            | 2                                                | 2                                                 |
| D <sub>c</sub> (g/cm <sup>-3</sup> )         | 1.585                                            | 1.699                                             |
| M (mm <sup>-1</sup> )                        | 3.356                                            | 3.140                                             |
| F(000)                                       | 292                                              | 336                                               |
| Crystal size (mm)                            | 0.31 x 0.30 x 0.25                               | 0.30 x 0.20 x 0.20                                |
| Theta range for data collection              | 2.99 to 28.29 deg.                               | 3.12 to 34.75 deg.                                |
| Reflections collected / unique               | 9515 / 2107<br>[R(int) = 0.0501]                 | 13798 / 2298<br>[R(int) = 0.0277]                 |
| Completeness to theta = 25.05                | 98.5 %                                           | 98.8 %                                            |
| Max. and min. transmission                   | 0.488 and 0.423                                  | 0.572 and 0.453                                   |
| Data / restraints / parameters               | 2107 / 0 / 155                                   | 2293 / 0 / 182                                    |
| Goodness-of-fit                              | 1.129                                            | 1.06                                              |
| R <sub>1</sub> / wR <sub>2</sub> [I > 2σ(I)] | 0.0448 / 0.0859                                  | 0.0248 / 0.0816                                   |
| R <sub>1</sub> / wR <sub>2</sub> (all data)  | 0.0567 / 0.0899                                  | 0.0269 / 0.0851                                   |

# $^1\text{H}$ and $^{13}\text{C}$ NMR Spectra of Alkali-metal Organomagnesiates Complexes

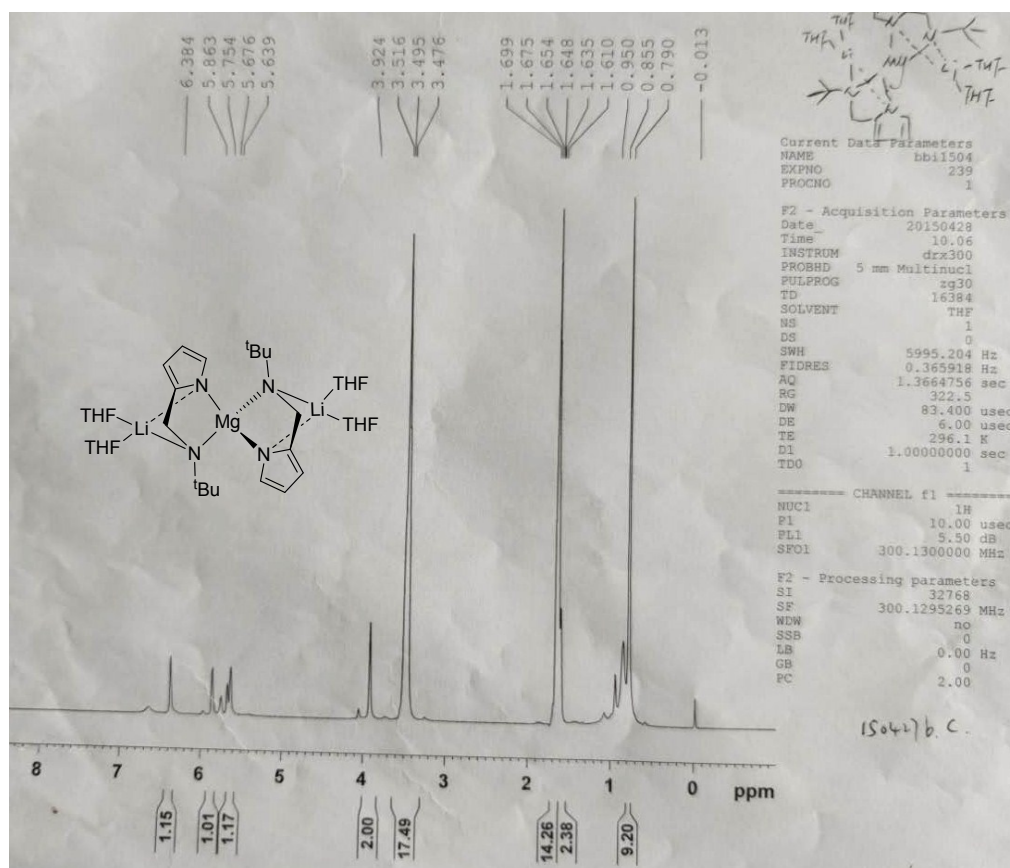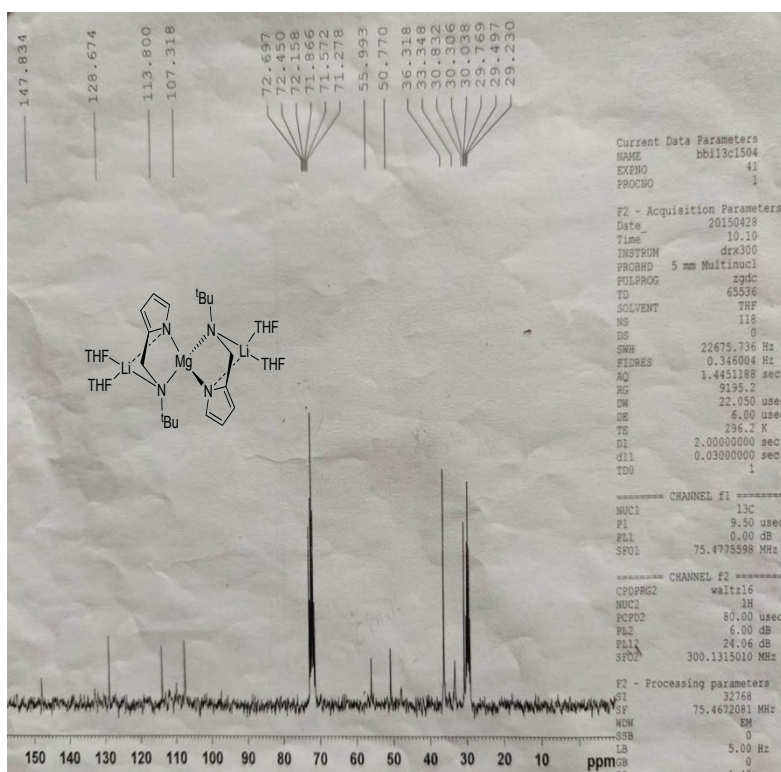

$^1\text{H}$  NMR and  $^{13}\text{C}$  NMR spectrum of complex (1) in  $d_8$ -THF

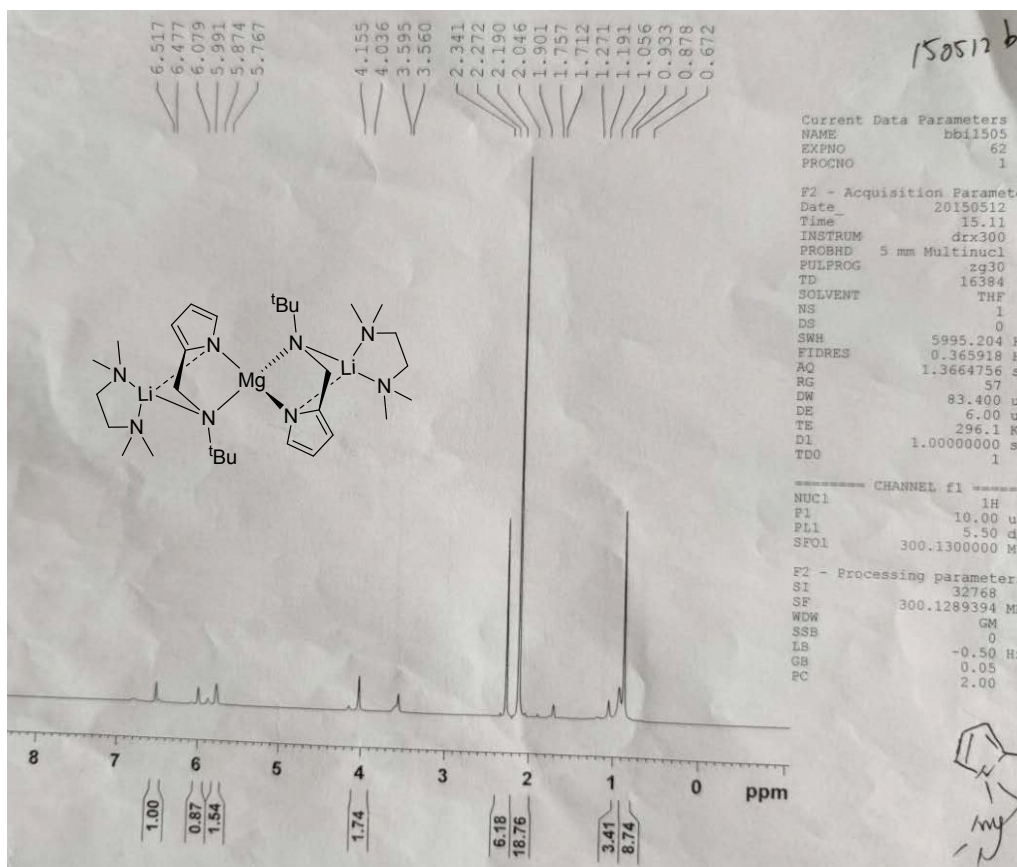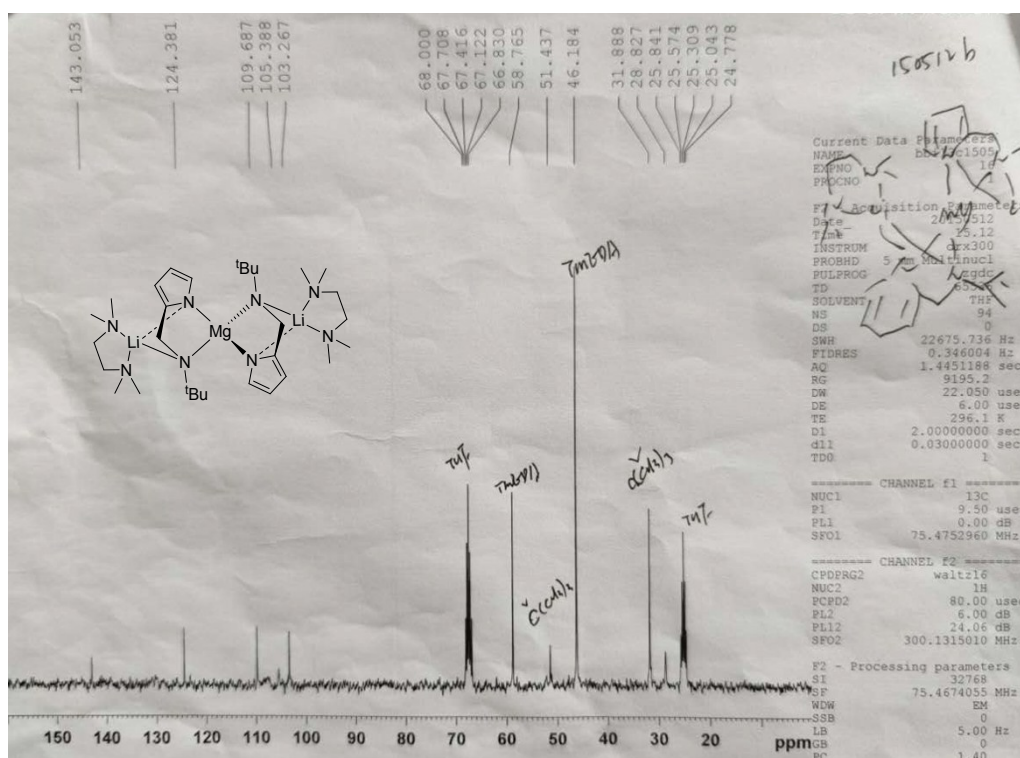

$^1\text{H}$  NMR and  $^{13}\text{C}$  NMR spectrum of complex (2) in  $d_8$ -THF

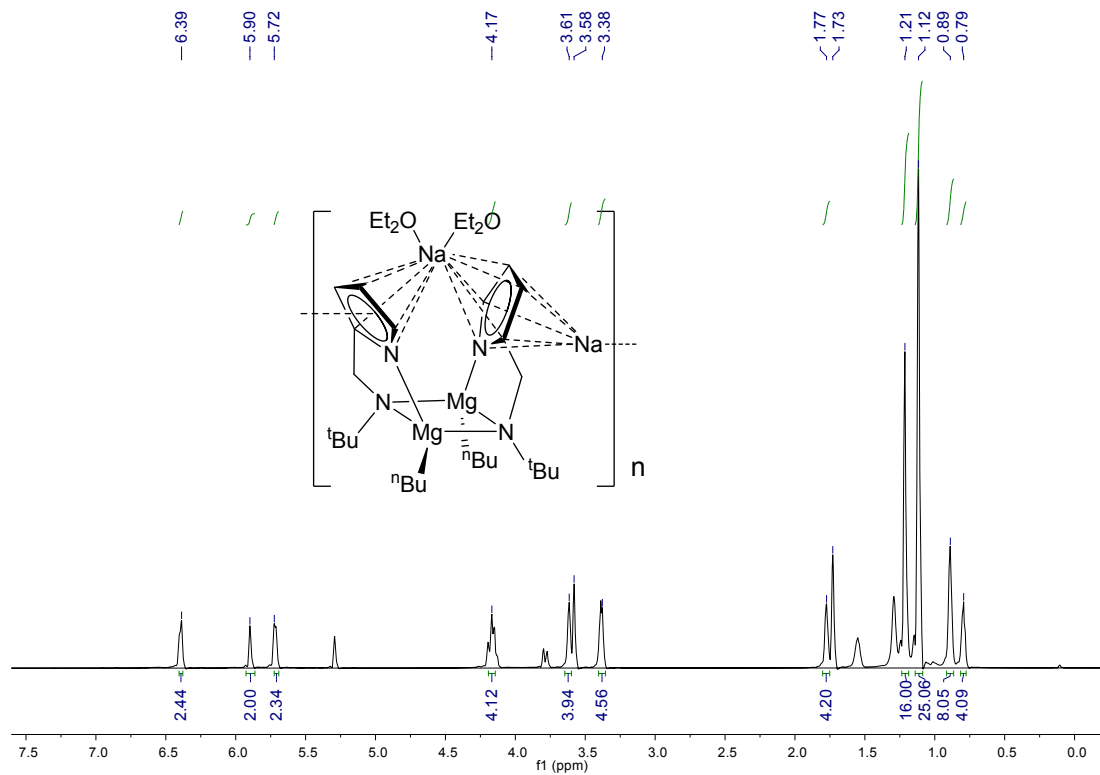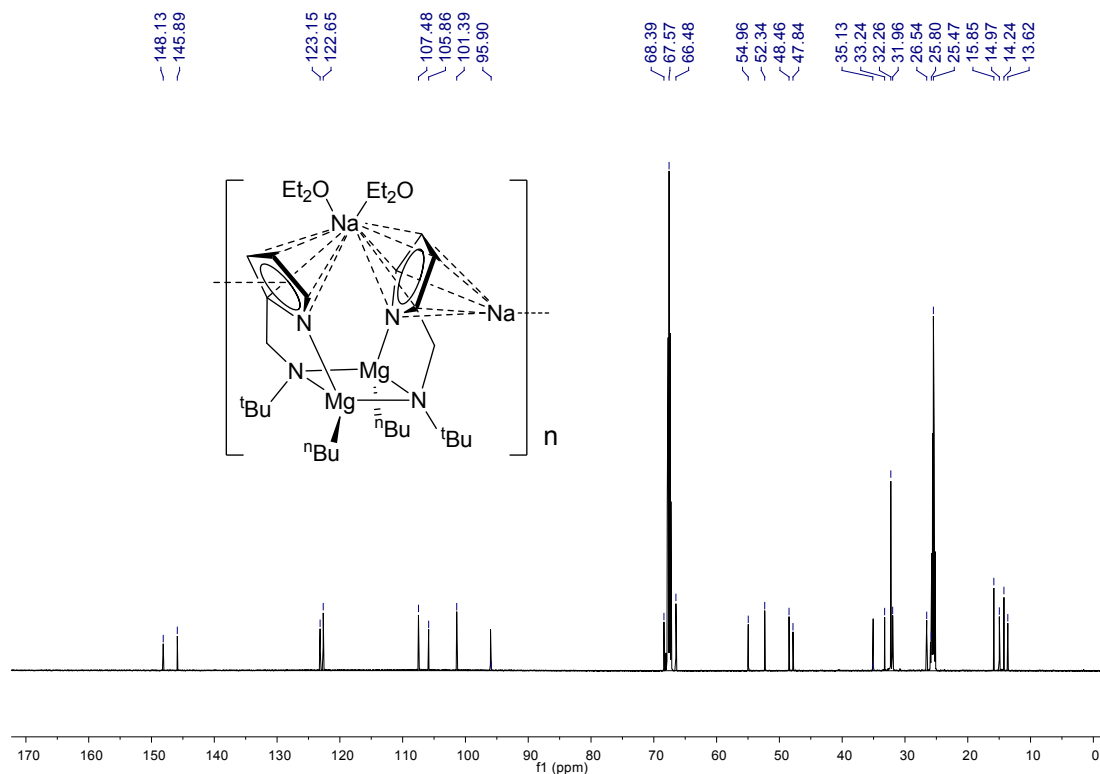

<sup>1</sup>H NMR and <sup>13</sup>C NMR spectrum of complex (3) in d<sub>8</sub>-THF

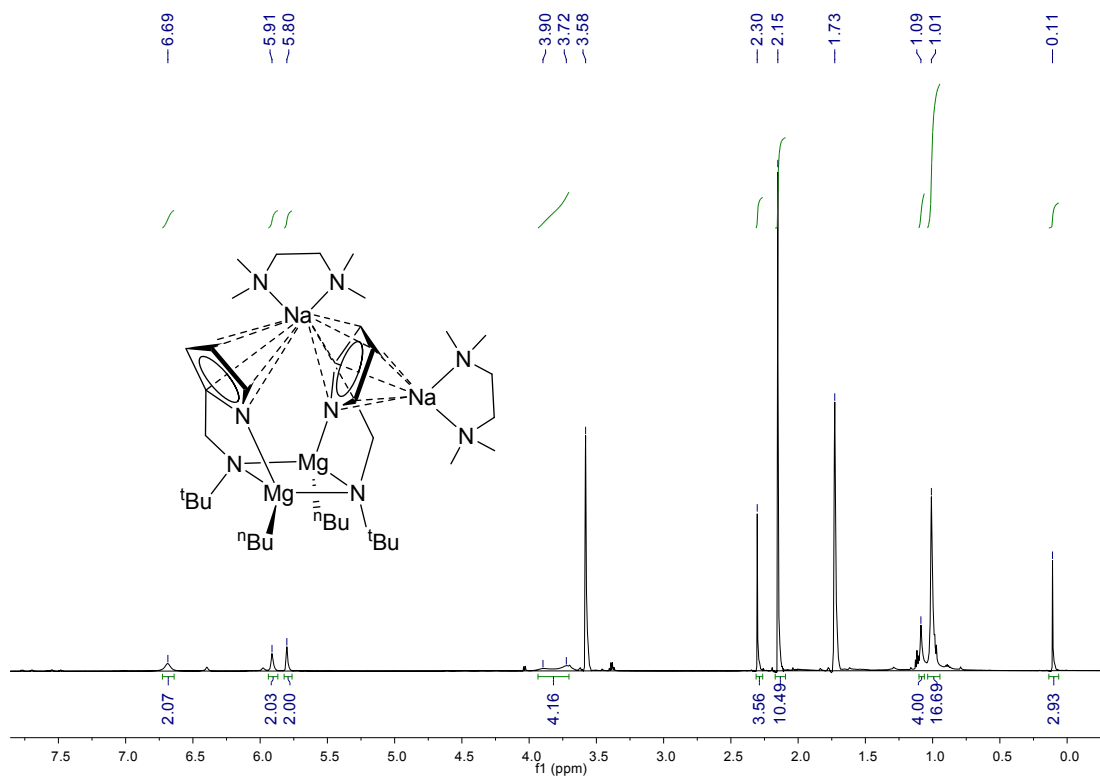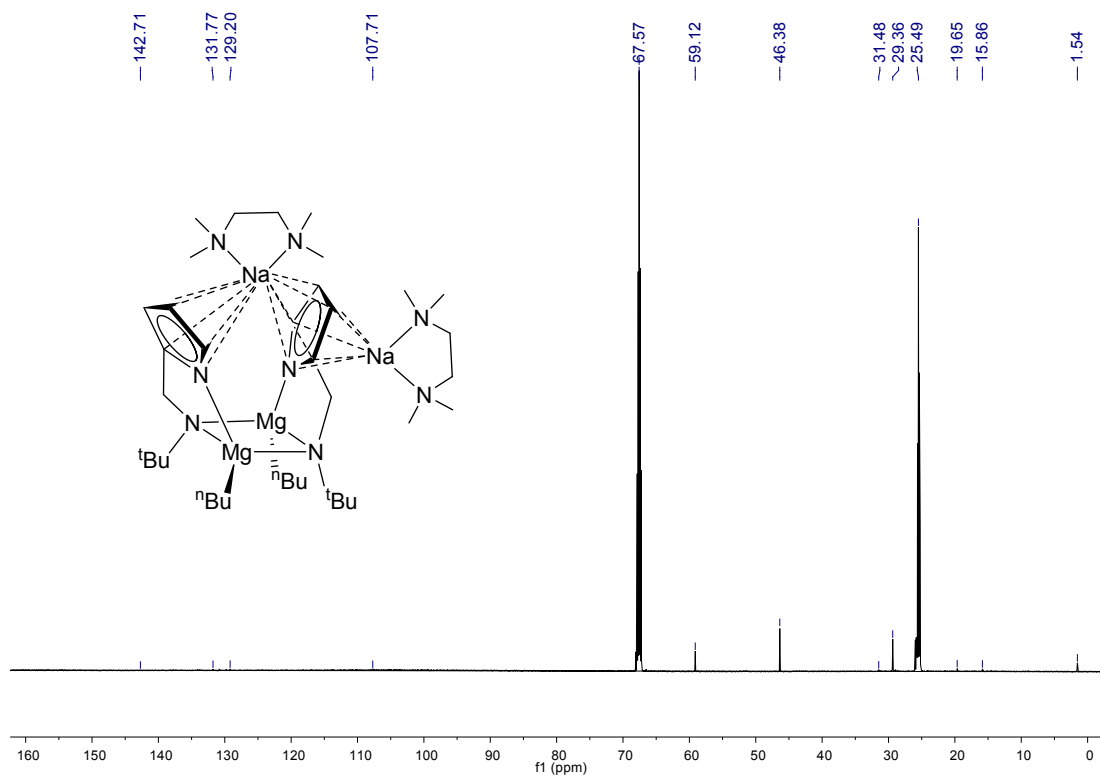

<sup>1</sup>H NMR and <sup>13</sup>C NMR spectrum of complex (4) in d<sub>8</sub>-THF

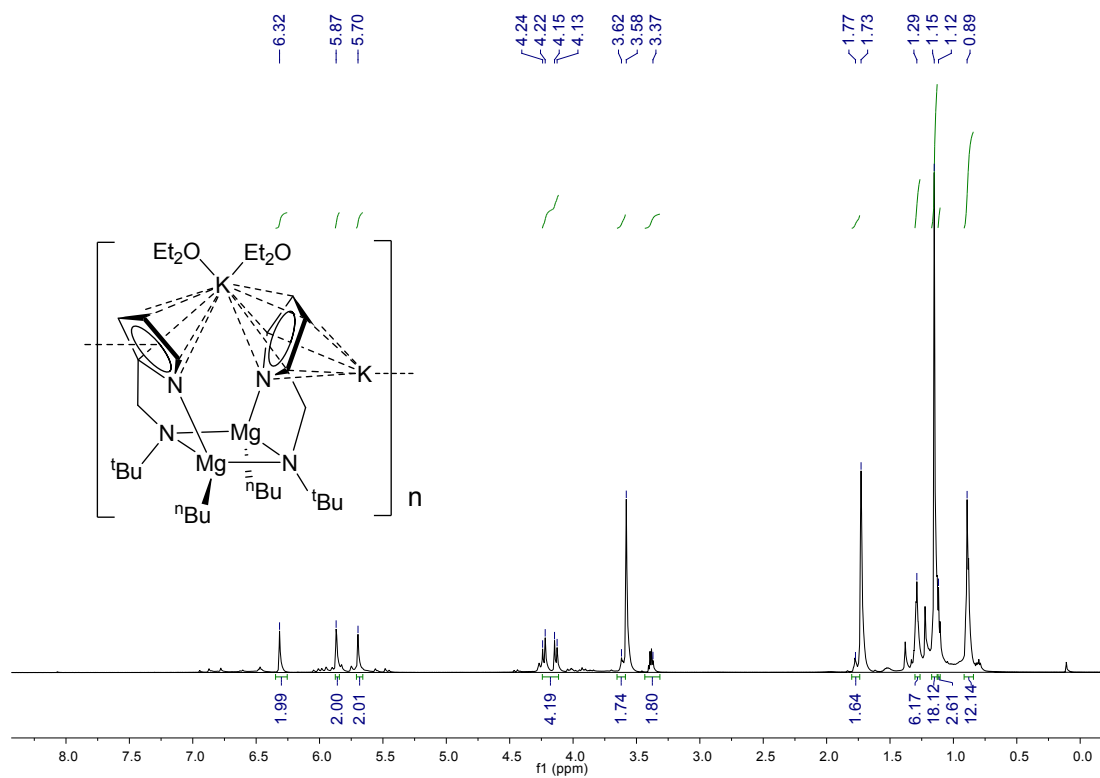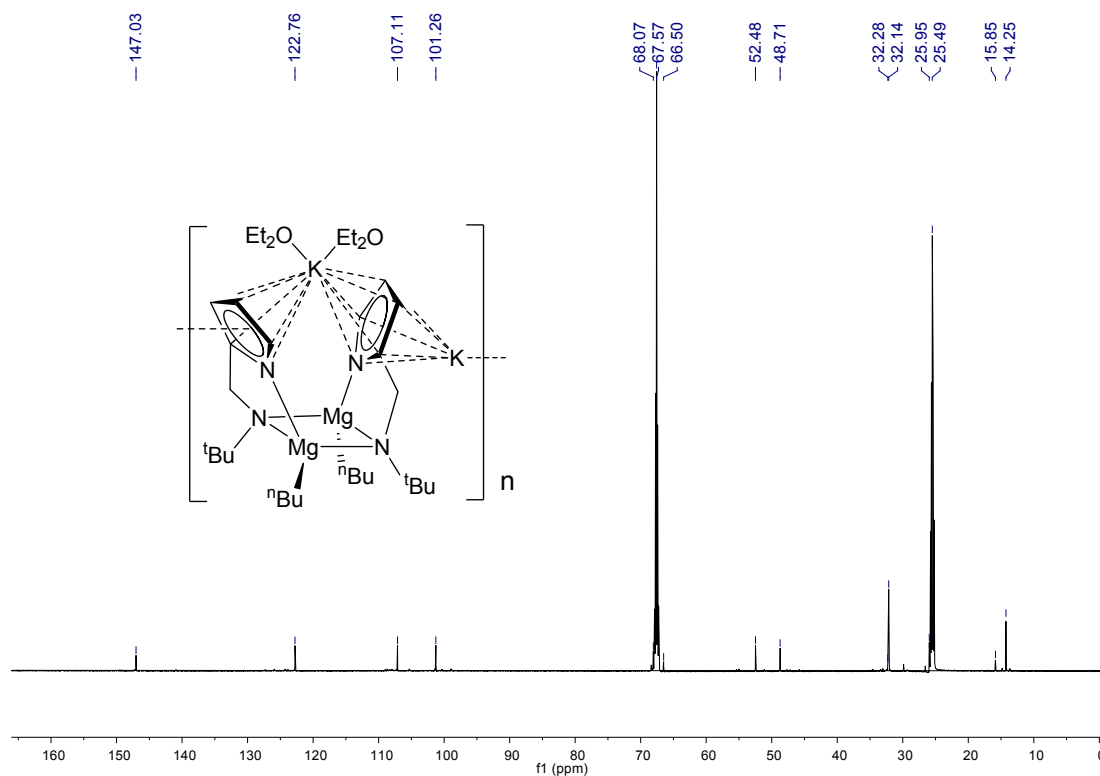

<sup>1</sup>H NMR and <sup>13</sup>C NMR spectrum of complex (5) in d<sub>8</sub>-THF

## Characterization Data of the Ester Compounds

(The ester compounds were identified through comparisons with the corresponding  $^1\text{H}$  NMR,  $^{13}\text{C}$  NMR data reported in the literatures.)

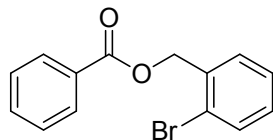

### *2-bromobenzyl benzoate*<sup>1</sup>

White solid, yield: 58%.  $^1\text{H}$  NMR (600 MHz,  $\text{CDCl}_3$ )  $\delta$  8.11 (d,  $J = 7.5$  Hz, 2H), 7.61 (d,  $J = 8.0$  Hz, 1H), 7.58 (t,  $J = 7.4$  Hz, 1H), 7.51 (d,  $J = 7.6$  Hz, 1H), 7.46 (t,  $J = 7.7$  Hz, 2H), 7.34 (t,  $J = 7.5$  Hz, 1H), 7.22 (t,  $J = 7.7$  Hz, 1H), 5.46 (s, 2H).  $^{13}\text{C}$  NMR (151 MHz,  $\text{CDCl}_3$ )  $\delta$  166.33 (s), 135.55 (s), 133.30 (s), 133.06 (s), 129.98 (dd,  $J = 22.7, 4.8$  Hz), 128.58 (s), 127.67 (s), 123.65 (s), 66.37 (s).

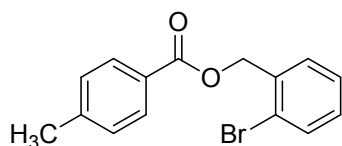

### *2-bromobenzyl-4-methylbenzoate*

Colourless liquid, yield: 54%.  $^1\text{H}$  NMR (600 MHz,  $\text{CDCl}_3$ )  $\delta$  7.99 (d,  $J = 8.2$  Hz, 2H), 7.59 (d,  $J = 8.0$  Hz, 1H), 7.49 (d,  $J = 7.7$  Hz, 1H), 7.32 (t,  $J = 8.0$  Hz, 1H), 7.24 (d,  $J = 7.9$  Hz, 2H), 7.19 (t,  $J = 7.7$  Hz, 1H), 5.42 (s, 2H), 2.40 (s, 3H).  $^{13}\text{C}$  NMR (151 MHz,  $\text{CDCl}_3$ )  $\delta$  166.36 (s), 143.99 (s), 135.67 (s), 132.99 (s), 130.02-129.68 (m), 129.27 (s), 127.63 (s), 127.30 (s), 123.54 (s), 66.15 (s), 21.78 (s).

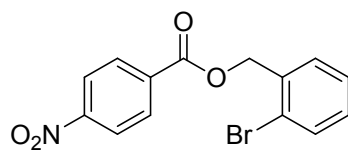

### *2-bromobenzyl-4-nitrobenzoate*

Yellow solid, yield: 65%.  $^1\text{H}$  NMR (600 MHz,  $\text{CDCl}_3$ )  $\delta$  8.27 (dd,  $J = 22.9, 9.0$  Hz, 4H), 7.63 (d,  $J = 8.0$  Hz, 1H), 7.50 (d,  $J = 7.6$  Hz, 1H), 7.36 (t,  $J = 7.5$  Hz, 1H), 7.27-7.23 (m, 1H), 5.49 (s, 2H).  $^{13}\text{C}$  NMR (151 MHz,  $\text{CDCl}_3$ )  $\delta$  164.47 (s), 150.77 (s), 135.43 (s), 134.73 (s), 133.25 (s), 131.03 (s), 130.58 (s), 130.39 (s), 127.79 (s), 124.05 (s), 123.74 (s), 67.33 (s).

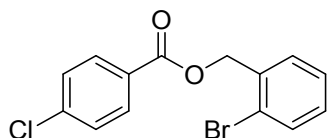

*2-bromobenzyl-4-chlorobenzoate*<sup>2</sup>

Colourless liquid, yield: 69%. <sup>1</sup>H NMR (600 MHz, CDCl<sub>3</sub>) δ 8.03 (d, *J* = 8.6 Hz, 2H), 7.61 (d, *J* = 8.0 Hz, 1H), 7.48 (d, *J* = 7.6 Hz, 1H), 7.42 (d, *J* = 8.6 Hz, 2H), 7.34 (t, *J* = 7.5 Hz, 1H), 7.22 (t, *J* = 7.7 Hz, 1H), 5.44 (s, 2H). <sup>13</sup>C NMR (151 MHz, CDCl<sub>3</sub>) δ 165.49 (s), 139.78 (s), 135.27 (s), 133.12 (s), 131.30 (s), 130.21 (s), 130.05 (s), 128.94 (s), 128.50 (s), 127.71 (s), 123.79 (s), 66.63 (s).

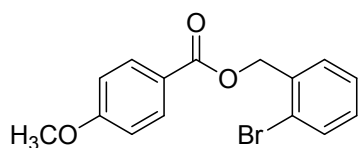

*2-bromobenzyl-4-methoxybenzoate*

Colourless liquid, yield: 48%. <sup>1</sup>H NMR (600 MHz, CDCl<sub>3</sub>) δ 8.05 (d, *J* = 8.9 Hz, 2H), 7.60 (d, *J* = 8.0 Hz, 1H), 7.49 (d, *J* = 7.6 Hz, 1H), 7.33 (t, *J* = 7.4 Hz, 1H), 7.20 (t, *J* = 7.6 Hz, 1H), 6.93 (d, *J* = 8.9 Hz, 2H), 5.41 (s, 2H), 3.86 (s, 3H). <sup>13</sup>C NMR (151 MHz, CDCl<sub>3</sub>) δ 166.04 (s), 163.66 (s), 135.77 (s), 132.99 (s), 131.94 (s), 129.91 (s), 129.75 (s), 127.63 (s), 123.54 (s), 122.44 (s), 113.81 (s), 66.05 (s), 55.57 (s).

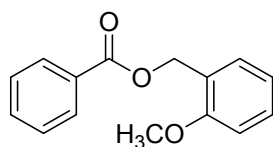

*2-Methoxybenzyl benzoate*<sup>2</sup>

Colourless liquid, yield: 72%. <sup>1</sup>H NMR (600 MHz, CDCl<sub>3</sub>) δ 8.08 (dd, *J* = 8.4, 1.3 Hz, 2H), 7.53 (t, *J* = 7.4 Hz, 1H), 7.44-7.40 (m, 3H), 7.31 (t, *J* = 7.9 Hz, 1H), 6.96 (t, *J* = 7.5 Hz, 1H), 6.90 (d, *J* = 8.2 Hz, 1H), 5.42 (s, 2H), 3.84 (s, 3H). <sup>13</sup>C NMR (151 MHz, CDCl<sub>3</sub>) δ 166.64 (s), 157.61 (s), 132.97 (s), 130.51 (s), 129.80 (s), 129.54 (d, *J* = 11.0 Hz), 128.42 (s), 124.46 (s), 120.53 (s), 110.56 (s), 62.28 (s), 55.53 (s).

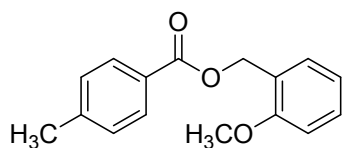

*2-Methoxybenzyl-4-methylbenzoate*<sup>3</sup>



Colourless liquid, yield: 75%.  $^1\text{H}$  NMR (600 MHz,  $\text{CDCl}_3$ )  $\delta$  7.97 (d,  $J = 8.2$  Hz, 2H), 7.41 (d,  $J = 7.5$  Hz, 1H), 7.30 (t,  $J = 7.9$  Hz, 1H), 7.21 (d,  $J = 8.0$  Hz, 2H), 6.96 (t,  $J = 7.5$  Hz, 1H), 6.89 (d,  $J = 8.2$  Hz, 1H), 5.40 (s, 2H), 3.83 (s, 3H), 2.39 (s, 3H).  $^{13}\text{C}$  NMR (151 MHz,  $\text{CDCl}_3$ )  $\delta$  166.65 (s), 157.52 (s), 143.57 (s), 129.79 (s), 129.40 (d,  $J = 14.3$  Hz), 129.10 (s), 127.73 (s), 124.64 (s), 120.48 (s), 110.49 (s), 62.03 (s), 55.46 (s), 21.70 (s).

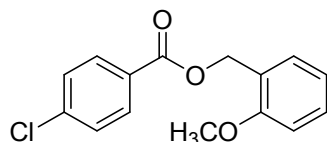

*2-methoxybenzyl-4-chlorobenzoate*<sup>2</sup>

White solid, yield: 79%.  $^1\text{H}$  NMR (600 MHz,  $\text{CDCl}_3$ )  $\delta$  8.03-7.99 (m, 2H), 7.42-7.38 (m, 3H), 7.33 (td,  $J = 8.1, 1.7$  Hz, 1H), 6.97 (t,  $J = 7.1$  Hz, 1H), 6.92 (d,  $J = 8.2$  Hz, 1H), 5.41 (s, 2H), 3.86 (s, 3H).  $^{13}\text{C}$  NMR (151 MHz,  $\text{CDCl}_3$ )  $\delta$  165.85 (s), 157.74 (s), 139.45 (s), 131.25 (s), 129.78 (d,  $J = 9.6$  Hz), 129.01 (s), 128.81 (s), 124.28 (s), 120.59 (s), 110.65 (s), 62.61 (s), 55.60 (s).

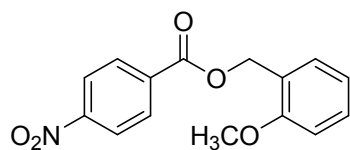

*2-Methoxybenzyl-4-nitrobenzoate*<sup>3</sup>

White solid, yield: 66%.  $^1\text{H}$  NMR (600 MHz,  $\text{CDCl}_3$ )  $\delta$  8.25 (d,  $J = 15.4$  Hz, 4H), 7.45-7.31 (m, 2H), 7.02-6.89 (m, 2H), 5.46 (s, 2H), 3.87 (s, 3H).  $^{13}\text{C}$  NMR (151 MHz,  $\text{CDCl}_3$ )  $\delta$  164.79 (s), 157.86 (s), 150.61 (s), 135.95 (s), 130.94 (s), 130.14 (d,  $J = 12.1$  Hz), 123.64 (d,  $J = 7.4$  Hz), 120.61 (s), 110.72 (s), 63.35 (s), 55.60 (s).

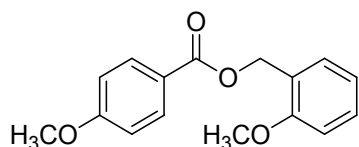

*2-methoxybenzyl 4-chlorobenzoate*<sup>2</sup>

White solid, yield: 65%.  $^1\text{H}$  NMR (600 MHz,  $\text{CDCl}_3$ )  $\delta$  8.04 (d,  $J = 9.0$  Hz, 2H), 7.41 (d,  $J = 7.5$  Hz, 1H), 7.32-7.28 (m, 1H), 6.96 (t,  $J = 7.5$  Hz, 1H), 6.91 (t,  $J = 5.9$  Hz, 3H), 5.39 (s, 2H), 3.84 (d,  $J = 3.6$  Hz, 6H).  $^{13}\text{C}$  NMR (151 MHz,  $\text{CDCl}_3$ )  $\delta$  166.39 (s),

163.42 (s), 157.55 (s), 131.82 (s), 129.41 (d,  $J = 10.4$  Hz), 124.76 (s), 122.94 (s),  
120.52 (s), 113.66 (s), 110.53 (s), 61.96 (s), 55.53 (d,  $J = 4.7$  Hz).

## References













































# $^1\text{H}$ and $^{13}\text{C}$ NMR Spectra of the Ester Compounds

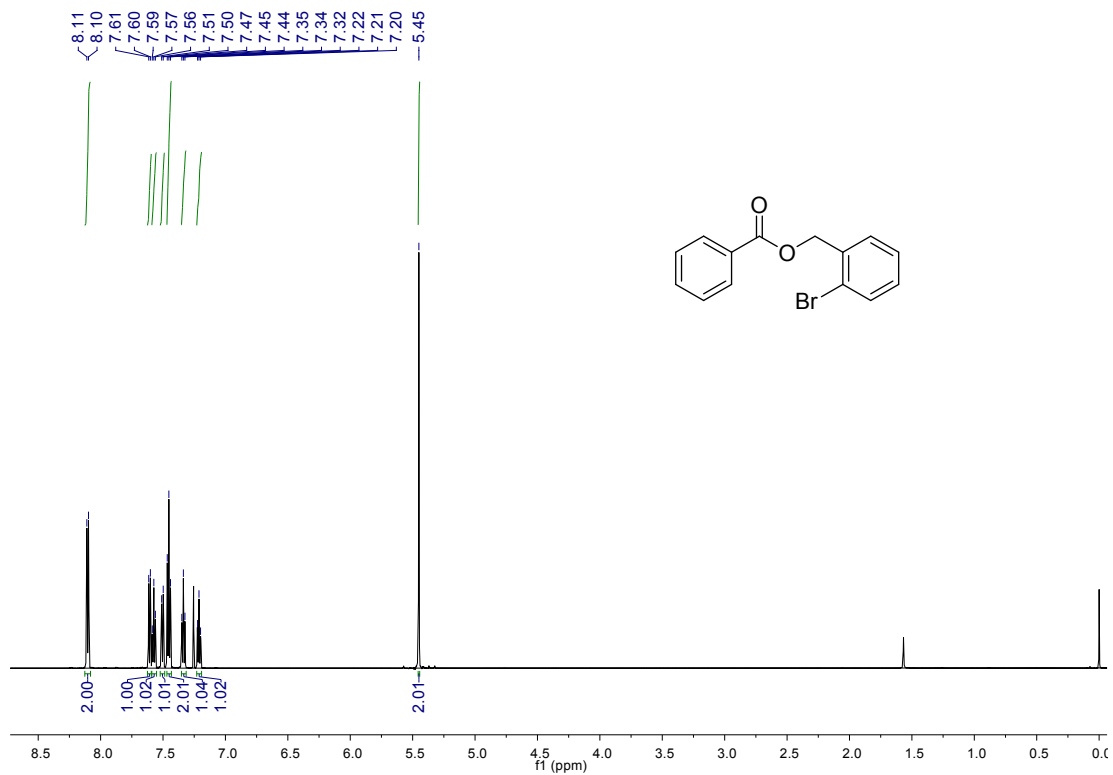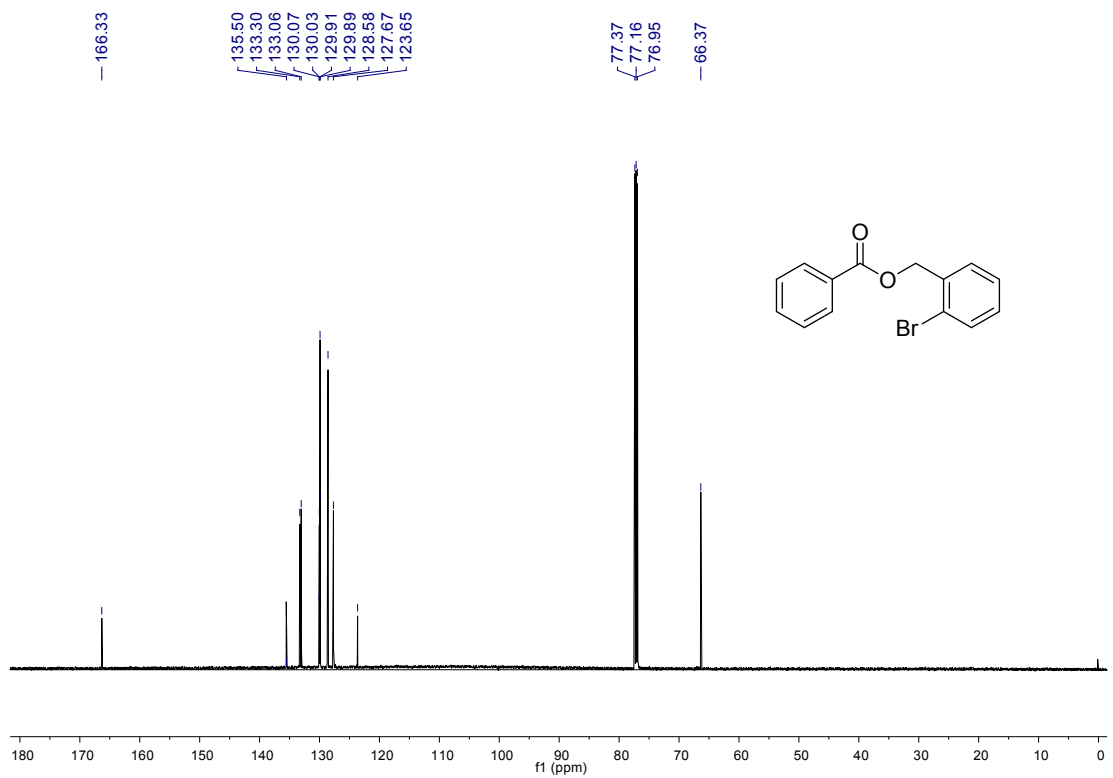

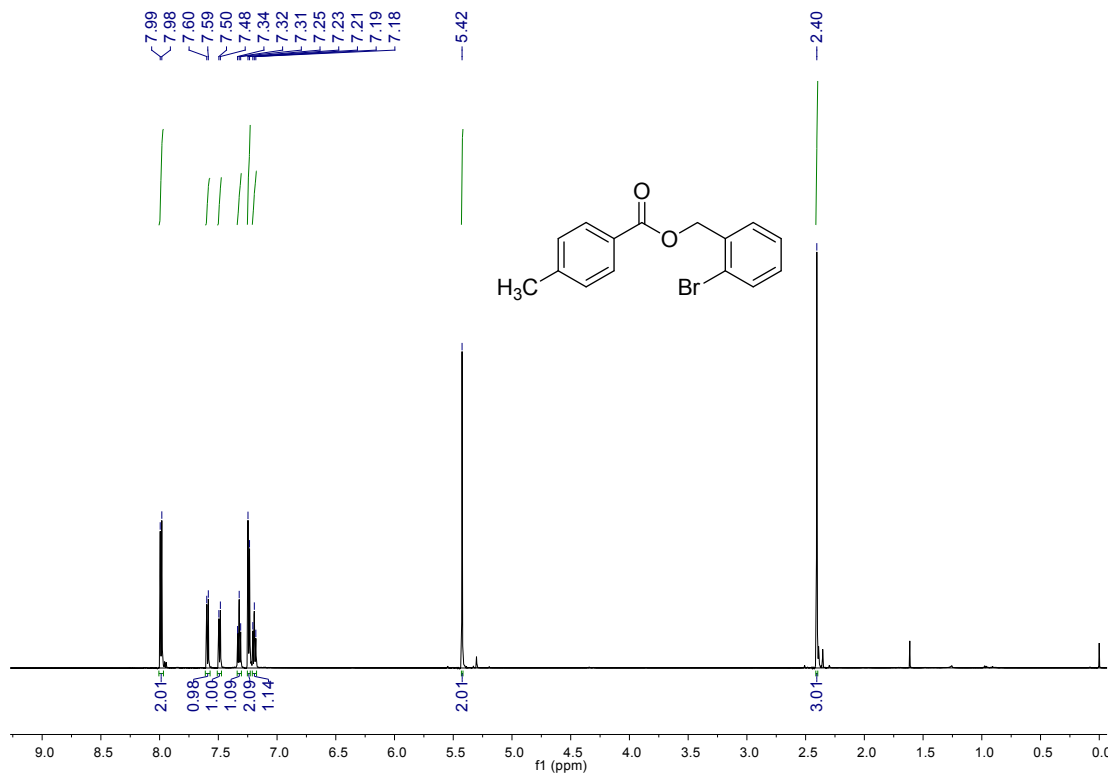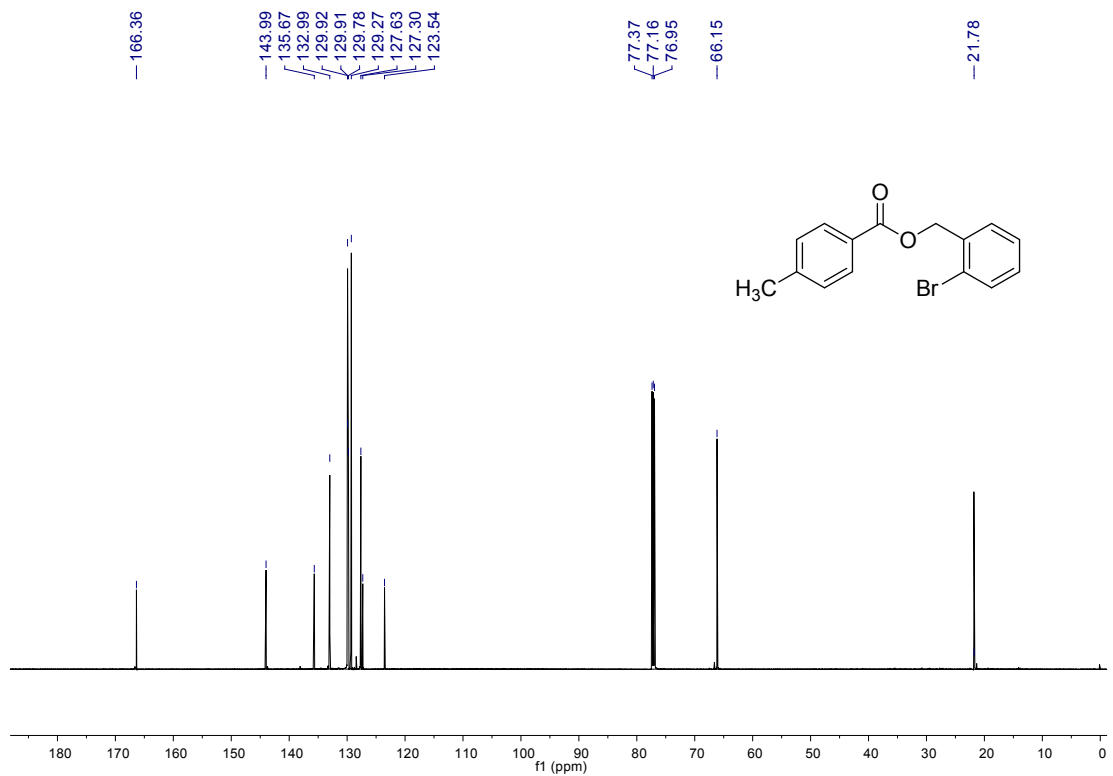



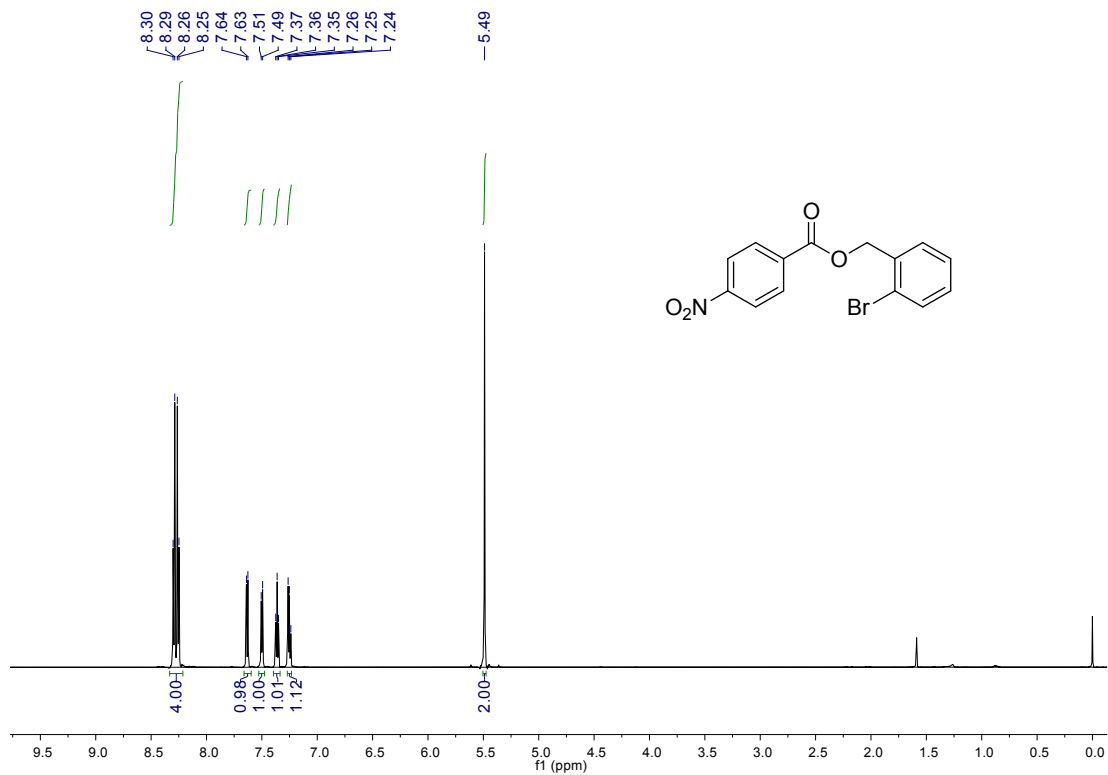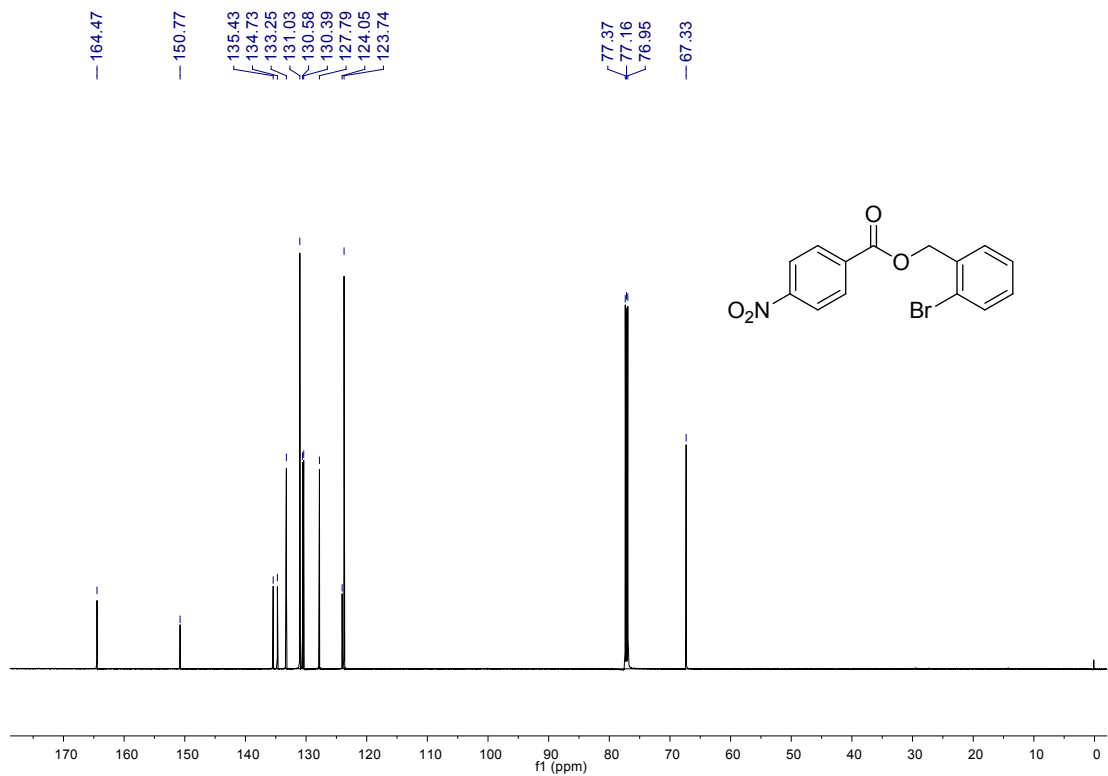

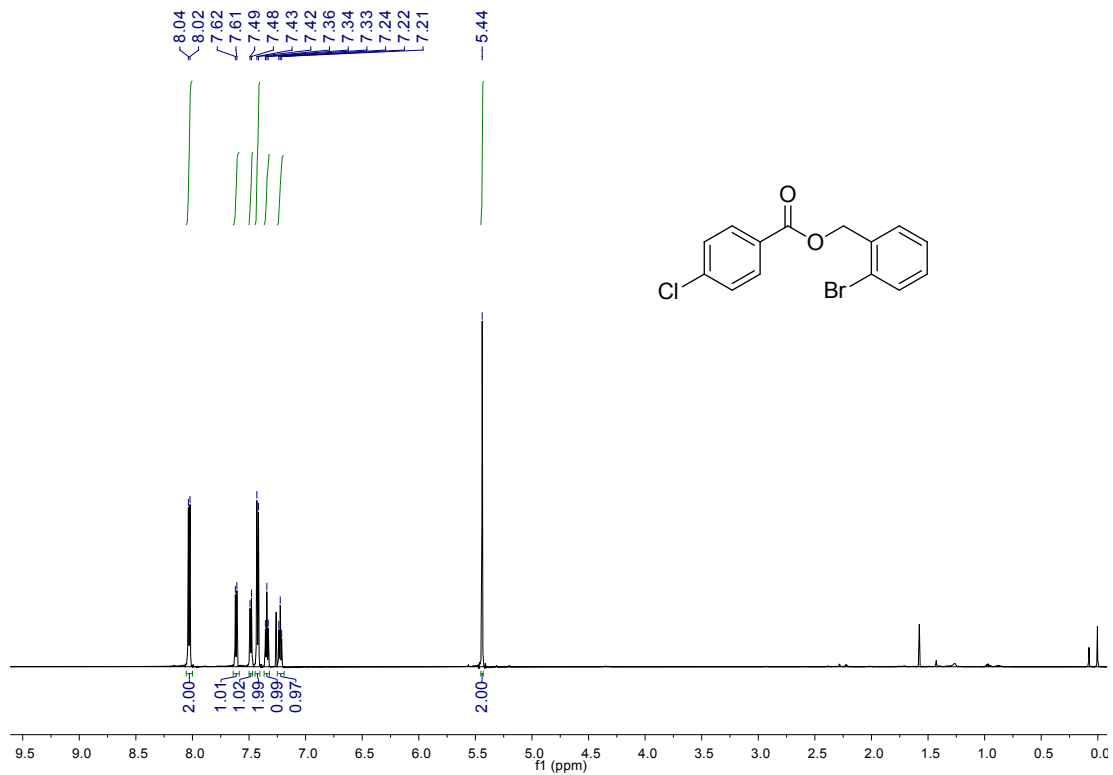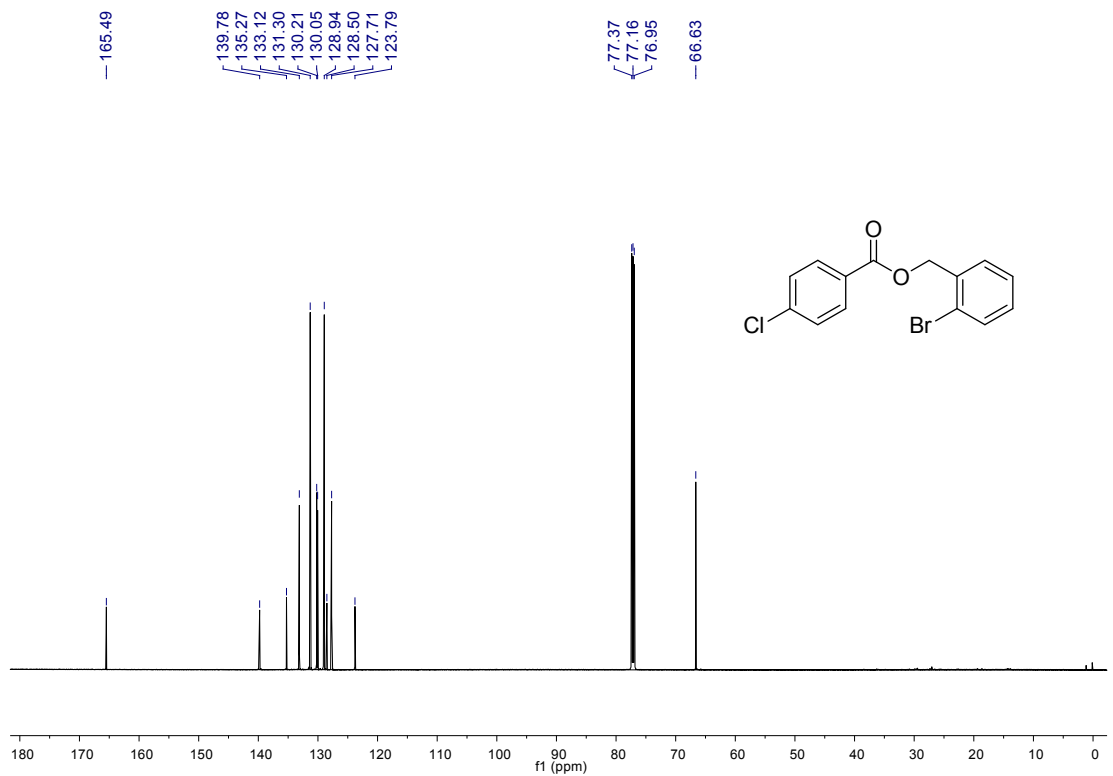

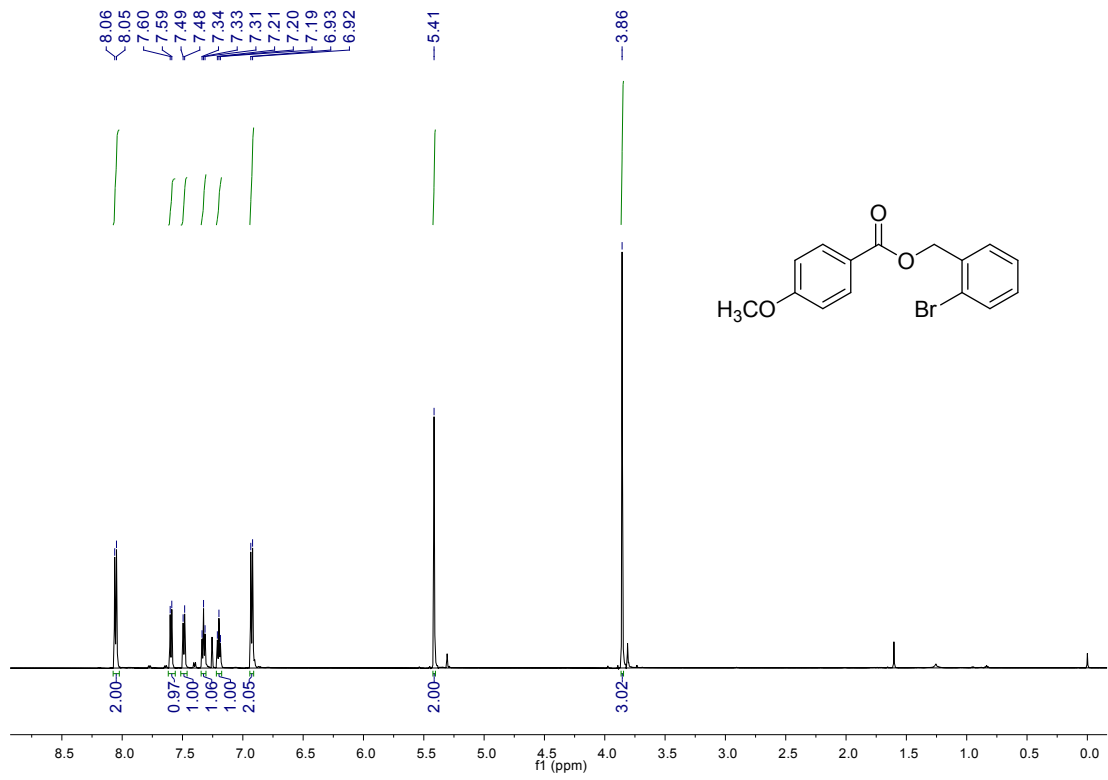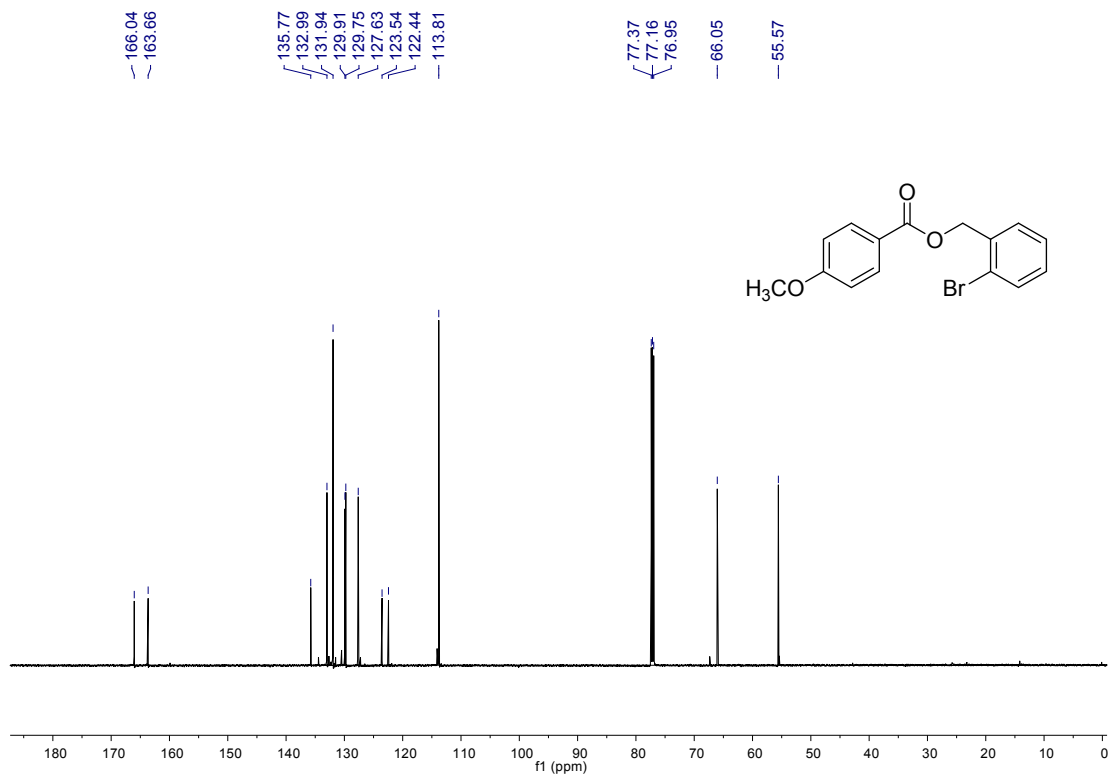

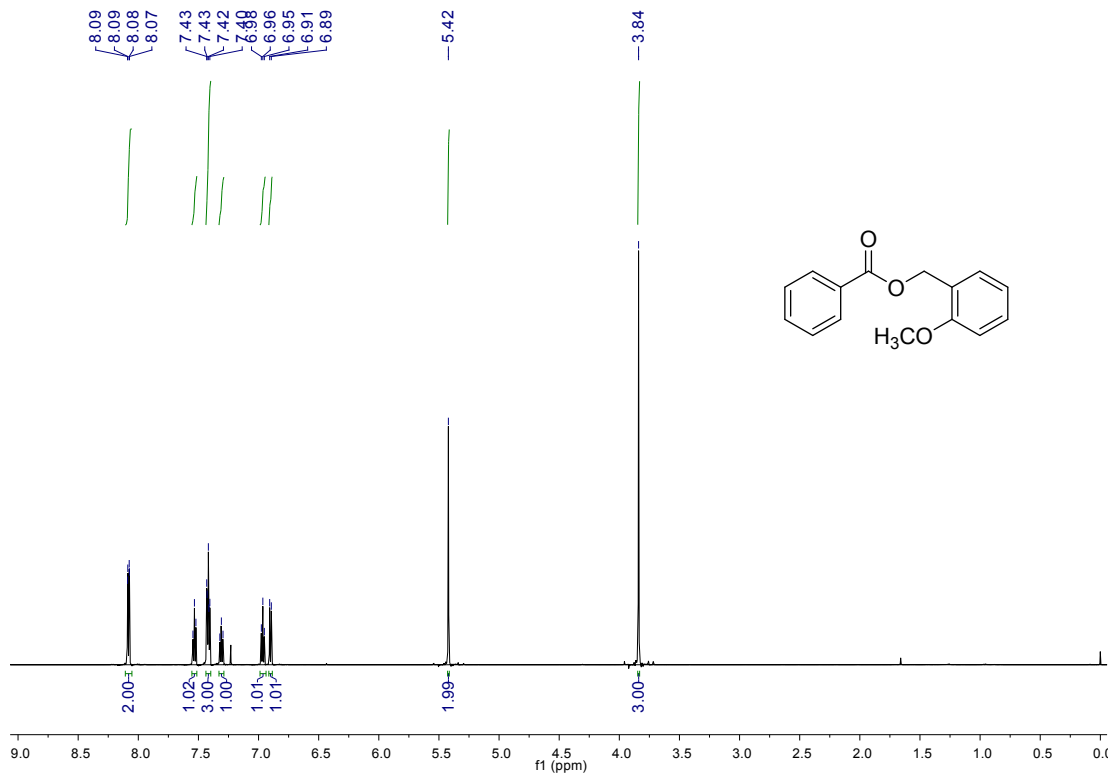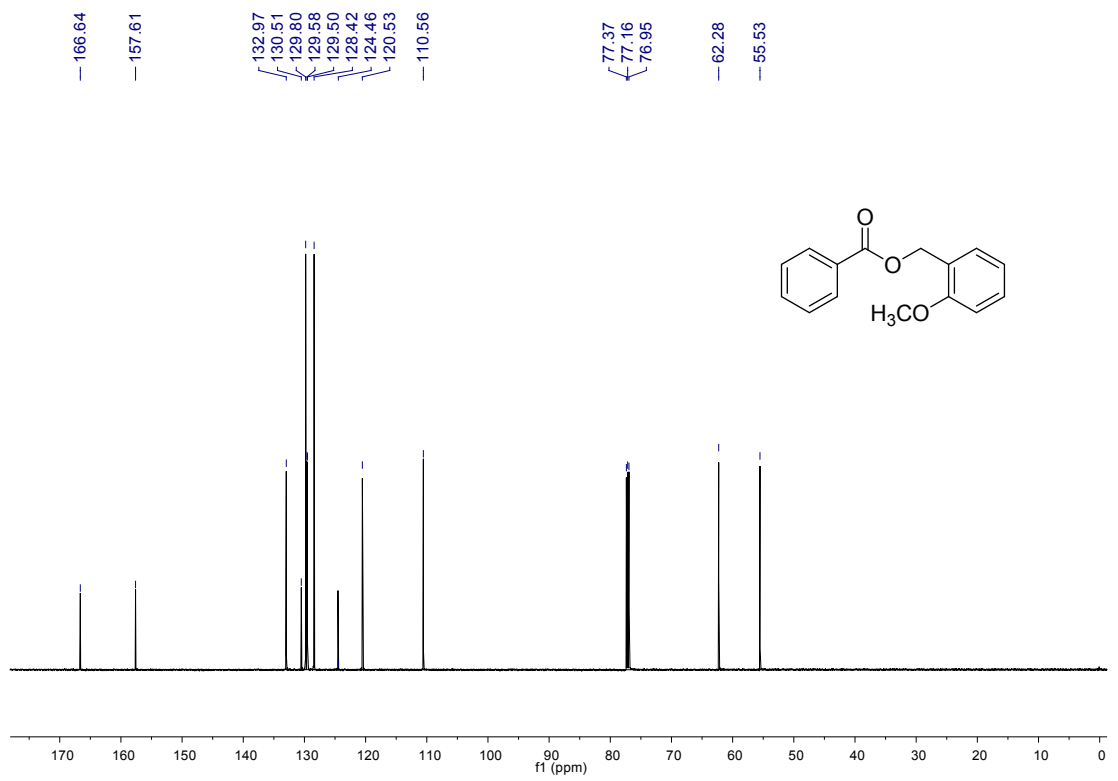

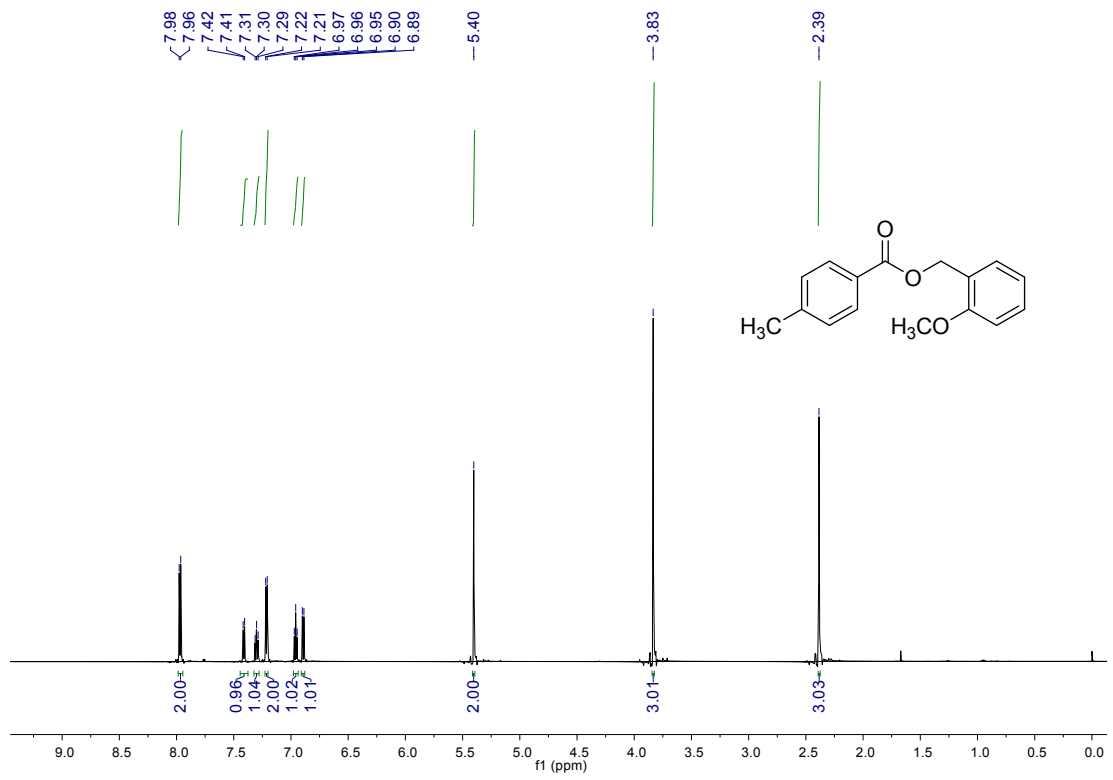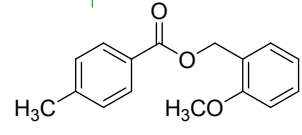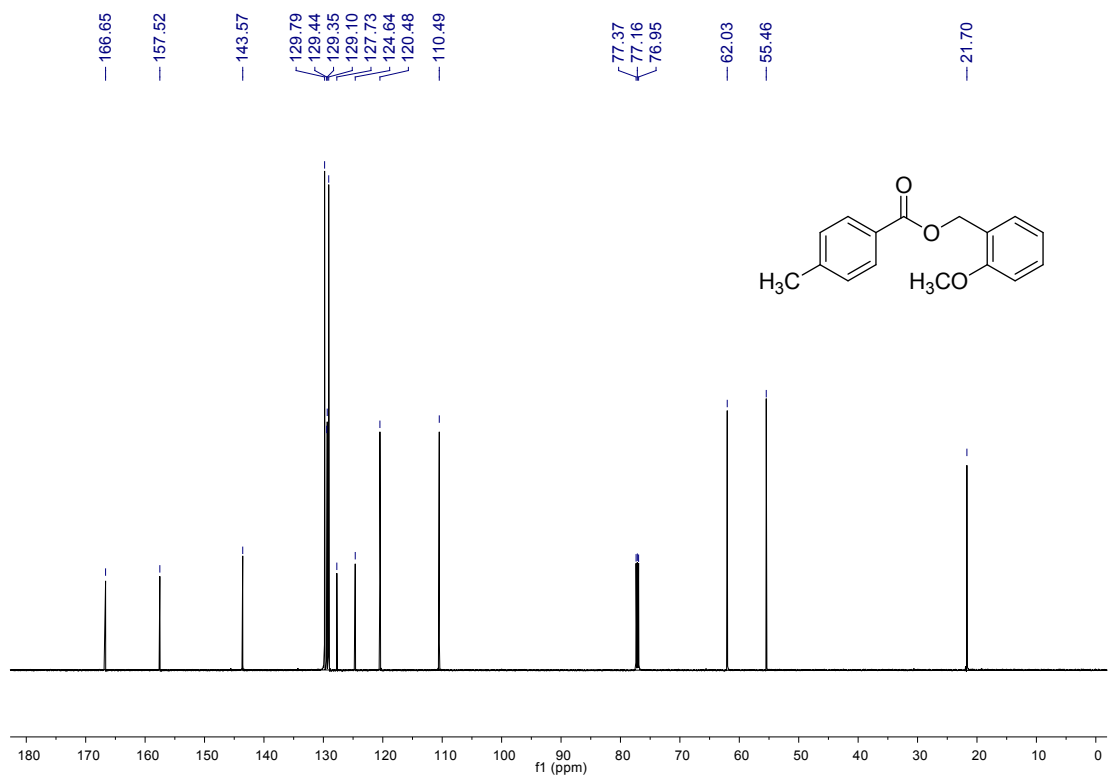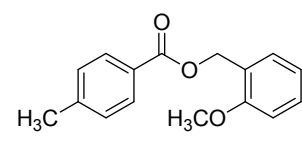

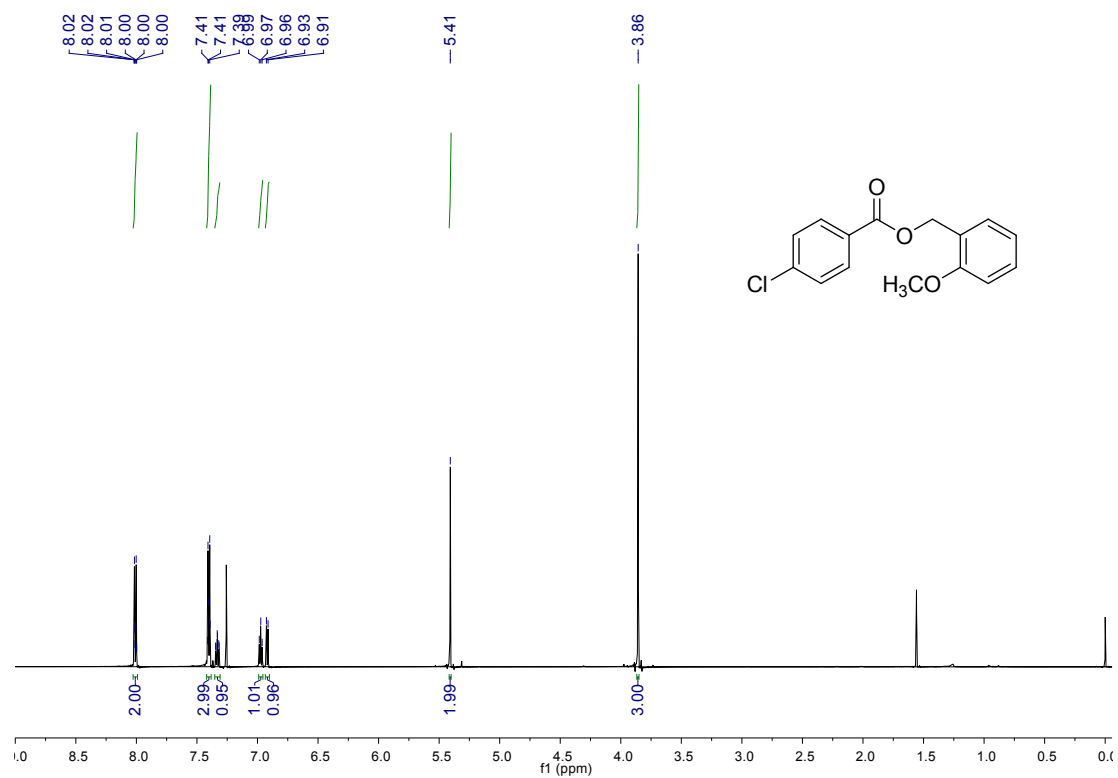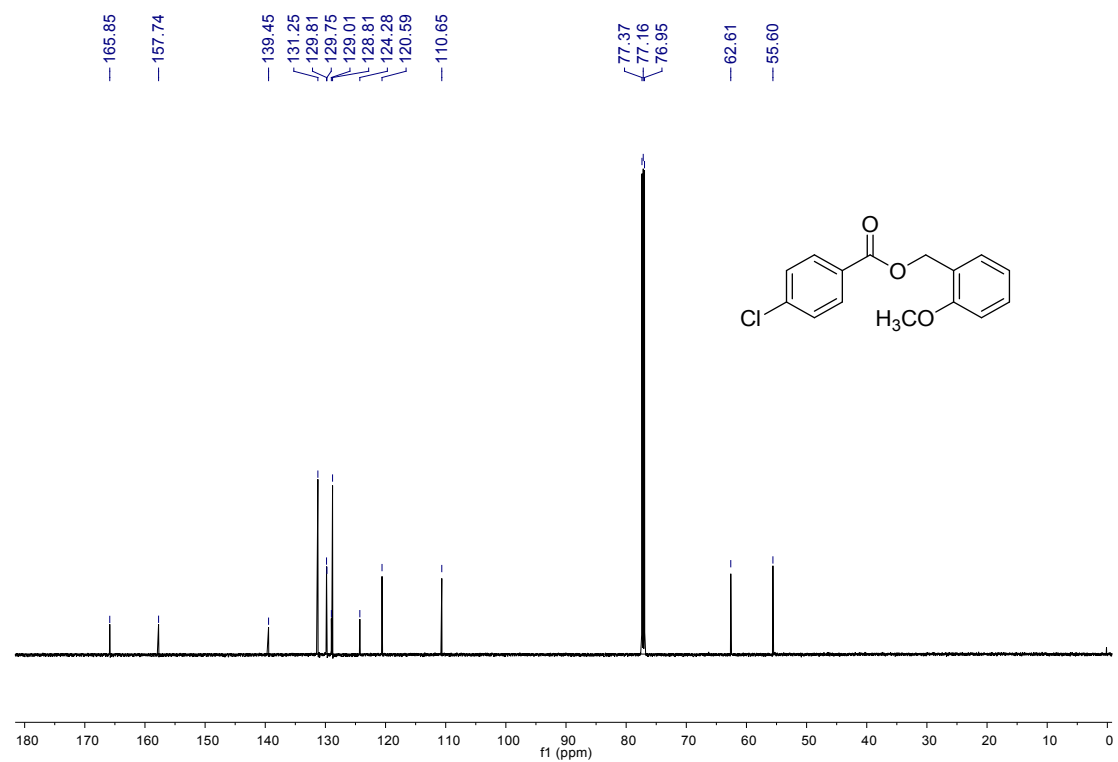

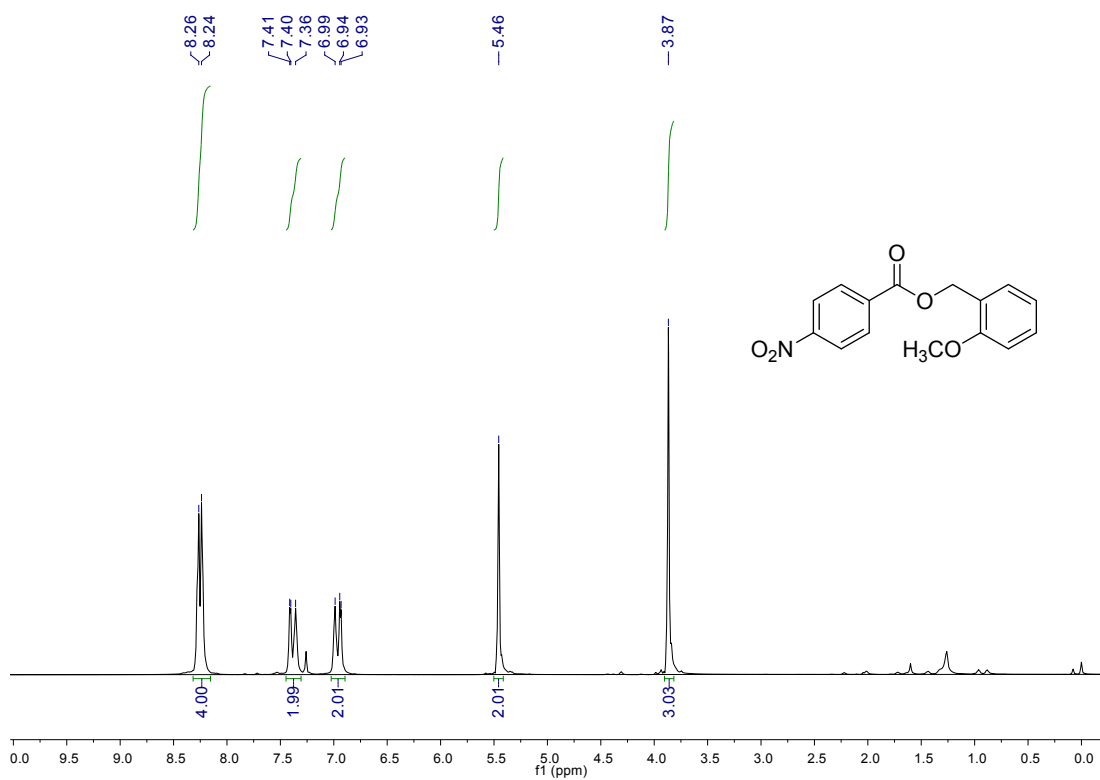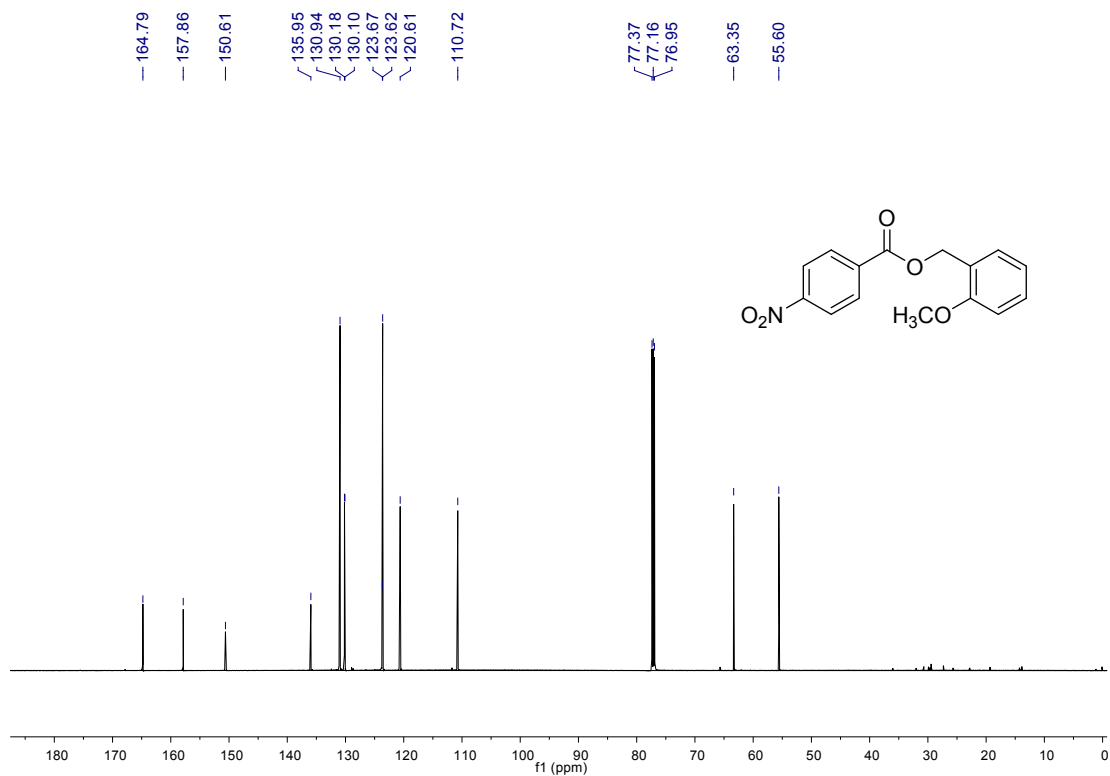

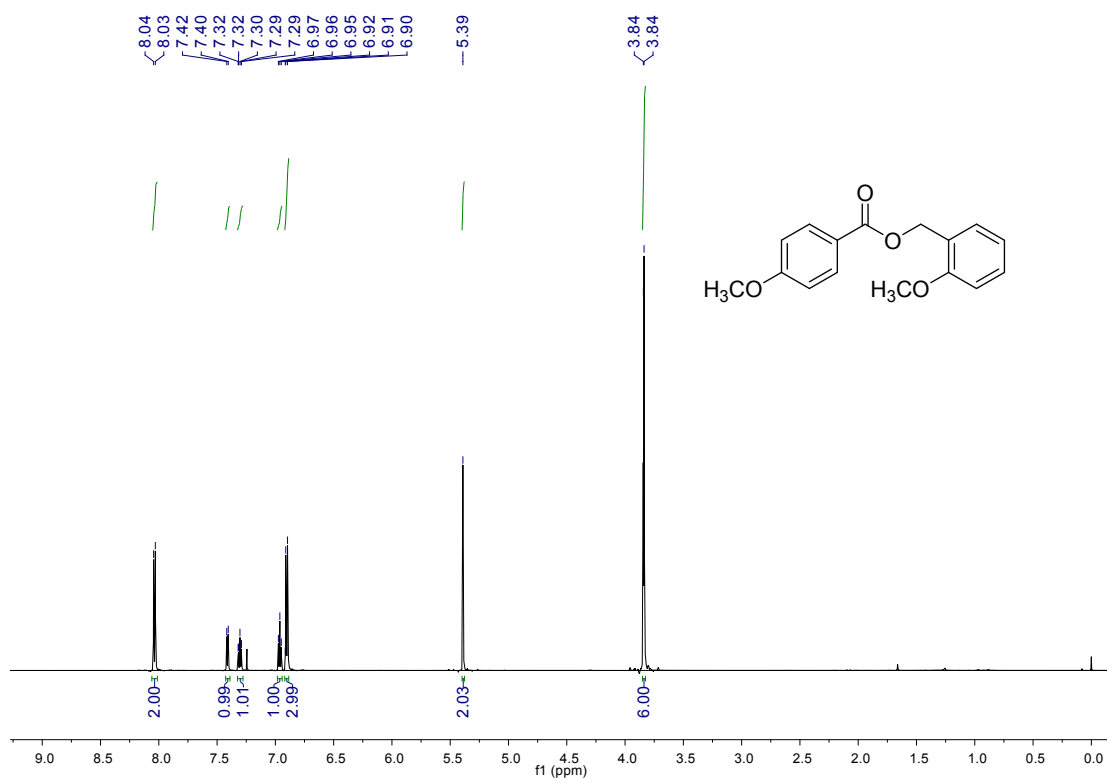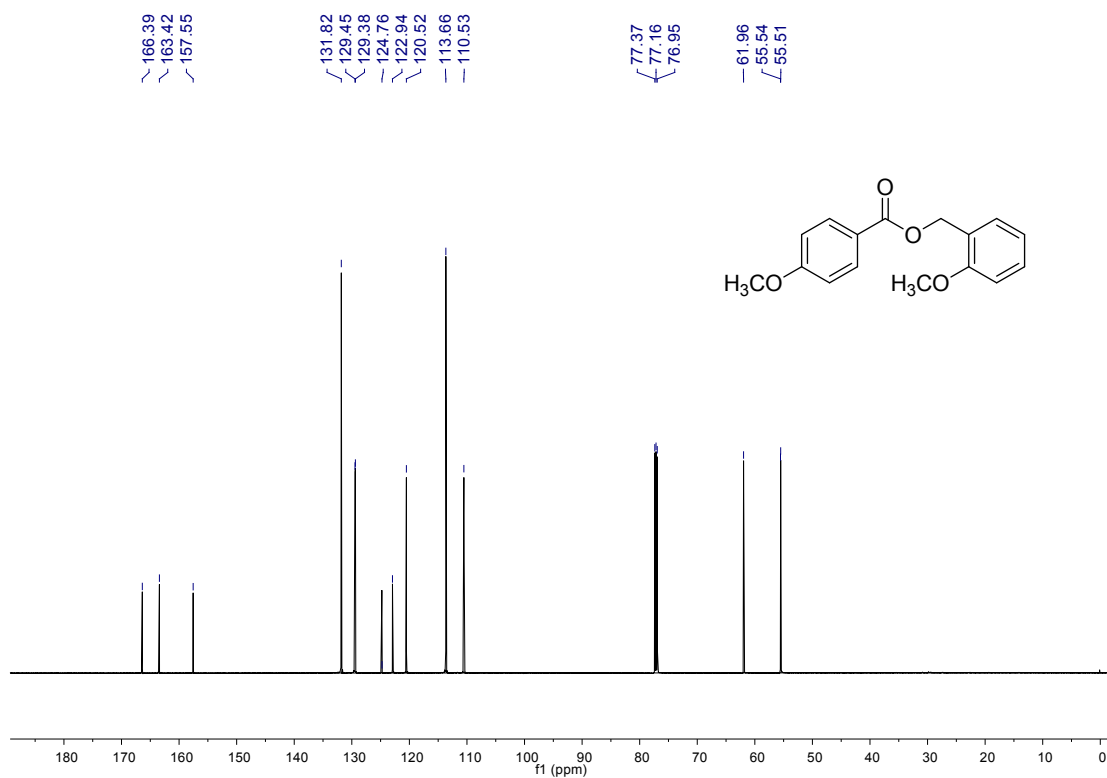

Supplement: d0dt01114b1.pdf [file d0dt01114b1.pdf]
